# Supplementary material for: Chemistry-led investigations into the mode of action of NAMPT activators, resulting in the discovery of non-pyridyl class NAMPT activators
Source: PubMed Central journal article supplement — Acta Pharm Sin B. 2022 Aug 1;13(2):709–21. doi: 10.1016/j.apsb.2022.07.016 (PMC9978853; doi:10.1016/j.apsb.2022.07.016), 2022-08-01
Supplement: mmc1.pdf [file mmc1.pdf]

**Supporting Information for**

**Original article**

**Chemistry-led investigations into the mode of action of NAMPT activators, resulting in the discovery of non-pyridyl class NAMPT activators**

Siyuan Tang<sup>a</sup>, Miguel Garzon Sanz<sup>a</sup>, Oliver Smith<sup>a</sup>, Andreas Krämer<sup>b,c,d,e</sup>, Daniel Egbase<sup>f</sup>, Paul W. Caton<sup>f</sup>, Stefan Knapp<sup>b,c,d,e</sup>, Sam Butterworth<sup>a,\*</sup>

<sup>a</sup>*Division of Pharmacy and Optometry, School of Health Sciences, Manchester Academic Health Sciences Centre, University of Manchester, Manchester M13 9PL, UK*

<sup>b</sup>*Structural Genomics Consortium (SGC), 60438 Frankfurt am Main, Germany*

<sup>c</sup>*Buchmann Institute for Life Sciences (BMLS), 60438 Frankfurt am Main, Germany*

<sup>d</sup>*Institut für Pharmazeutische Chemie, Goethe University, 60438 Frankfurt am Main, Germany*

<sup>e</sup>*Frankfurt Cancer Institute (FCI), 60596 Frankfurt am Main, Germany*

<sup>f</sup>*Department of Diabetes, School of Cardiovascular and Metabolic Medicine & Sciences, Faculty of Life Sciences & Medicine, King's College London, London SE1 1UL, UK*

\*Corresponding author. Tel.: +44 161 2752497.

E-mail address: [sam.butterworth@manchester.ac.uk](mailto:sam.butterworth@manchester.ac.uk) (Sam Butterworth).

Received 18 May 2022; received in revised form 22 June 2022; accepted 13 July 2022

## NMR spectra

### Phenyl (4-((8-oxa-3-azabicyclo[3.2.1]octan-3-yl)sulfonyl)phenyl)carbamate (11)

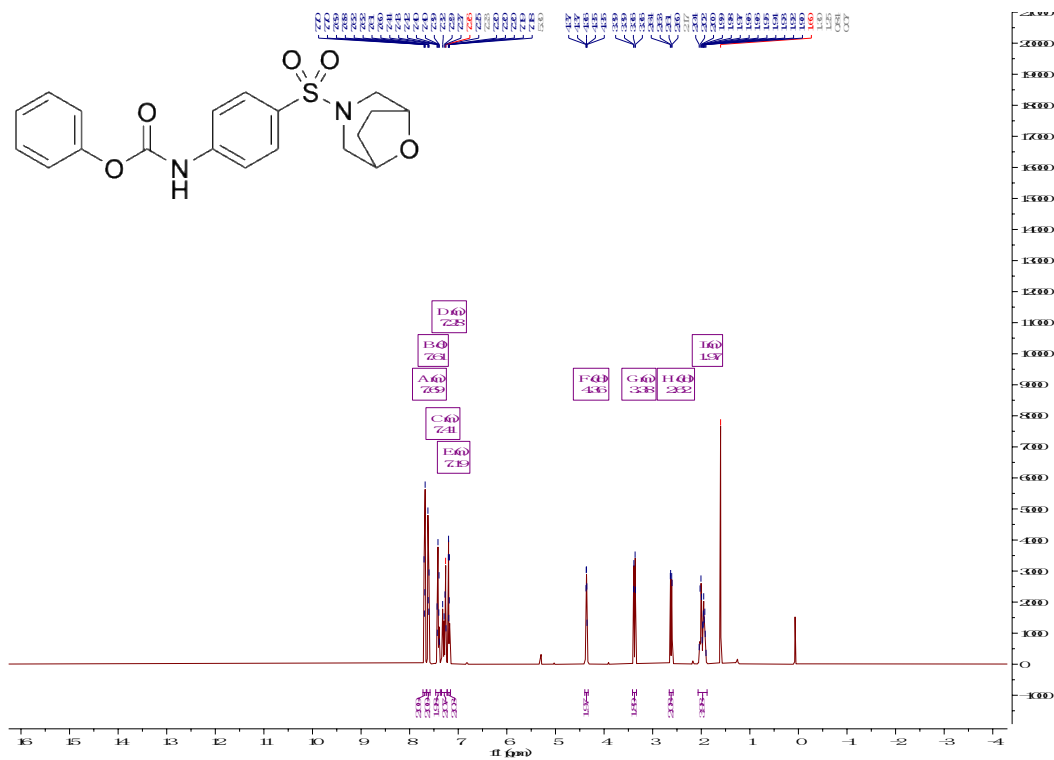

Figure S1. <sup>1</sup>H spectra of compound 11.

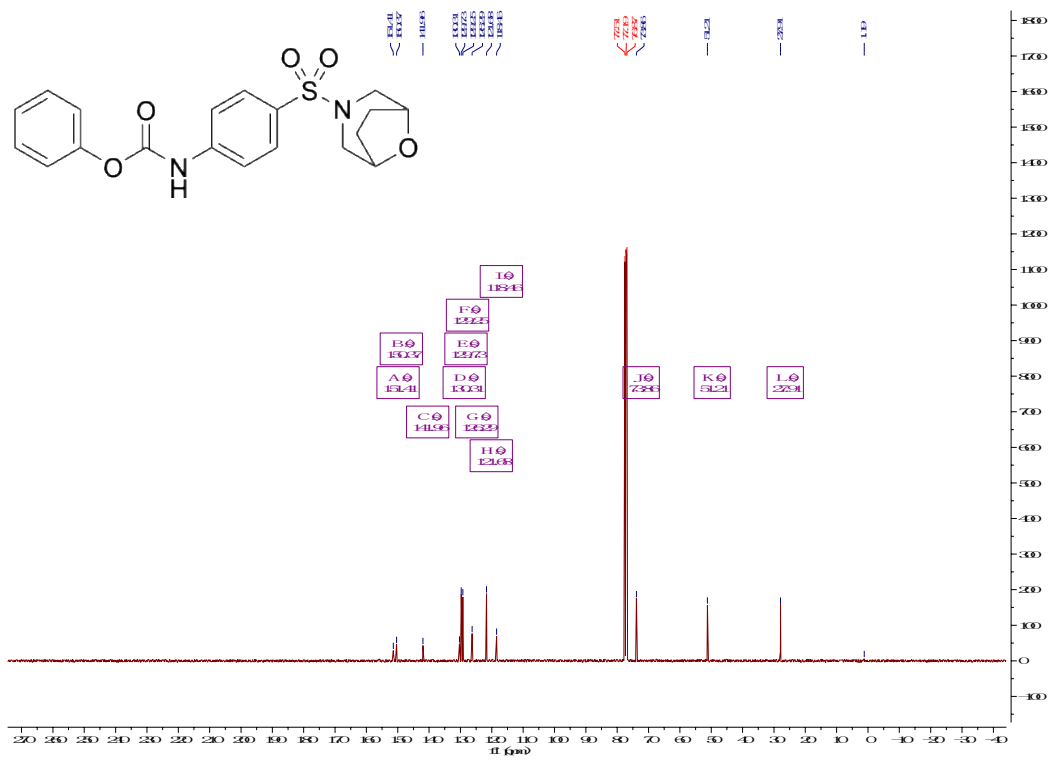

Figure S2. <sup>13</sup>C spectra of compound 11.

# Phenyl (4-(phenylsulfonyl)phenyl)carbamate (16)

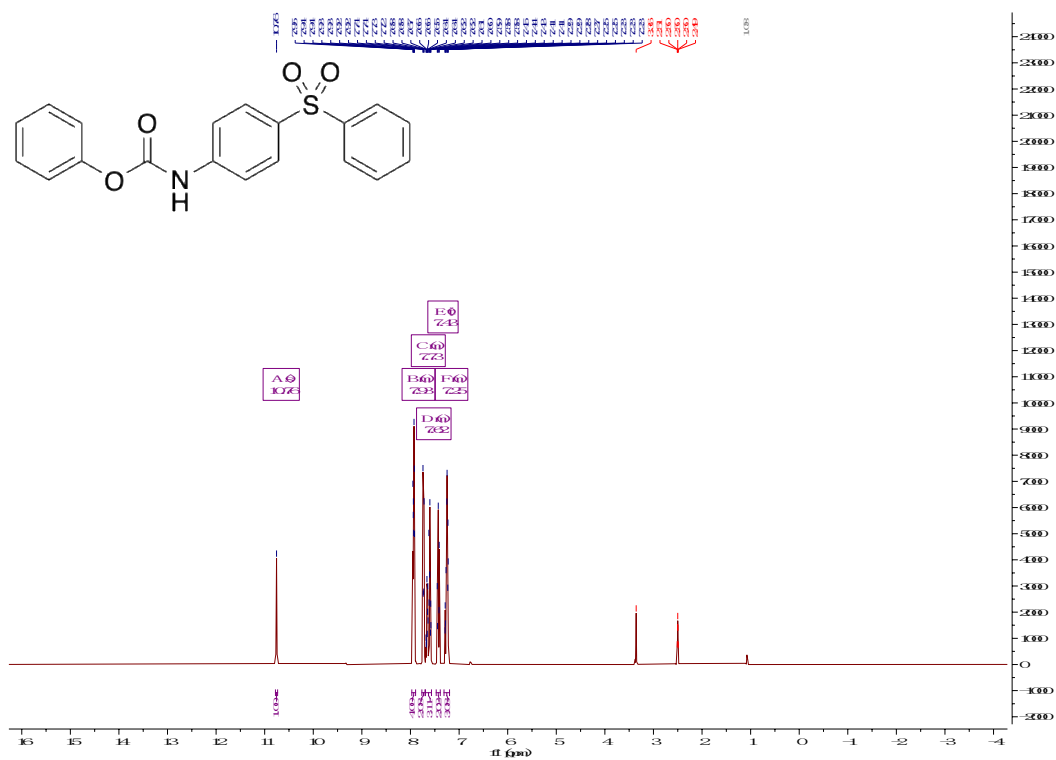

Figure S3. <sup>1</sup>H spectra of compound 16.

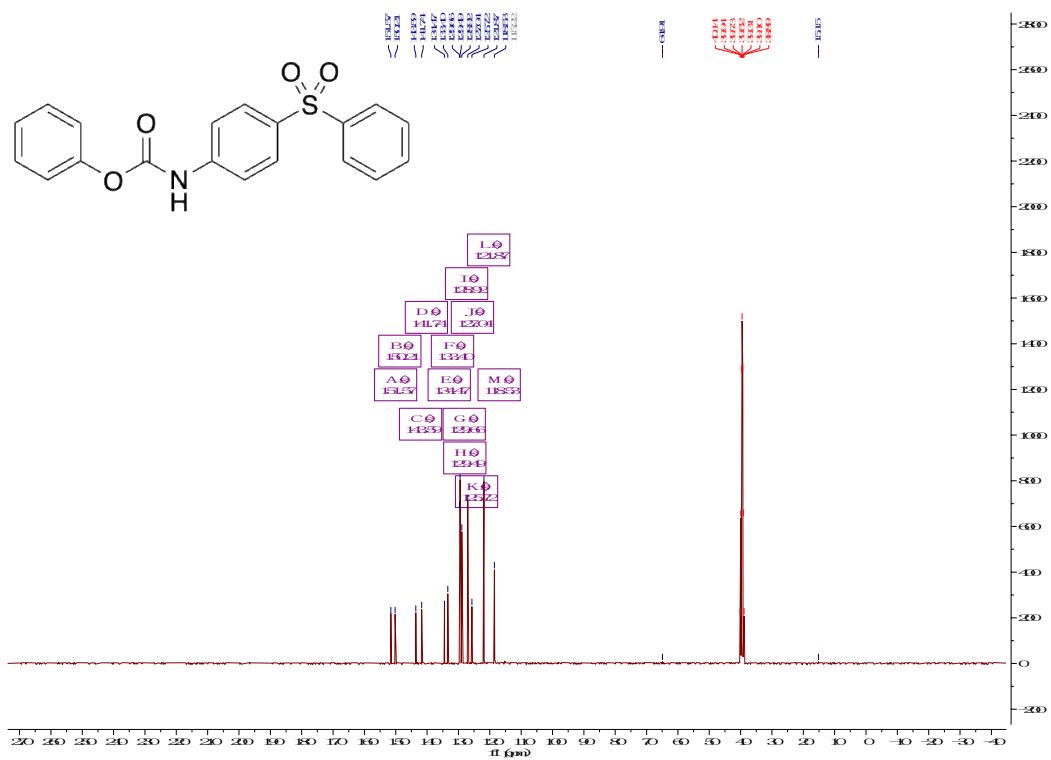

Figure S4. <sup>13</sup>C spectra of compound 16.

# 1-(4-((8-Oxa-3-azabicyclo[3.2.1]octan-3-yl)sulfonyl)phenyl)-3-(pyridin-4-yl)urea (6)

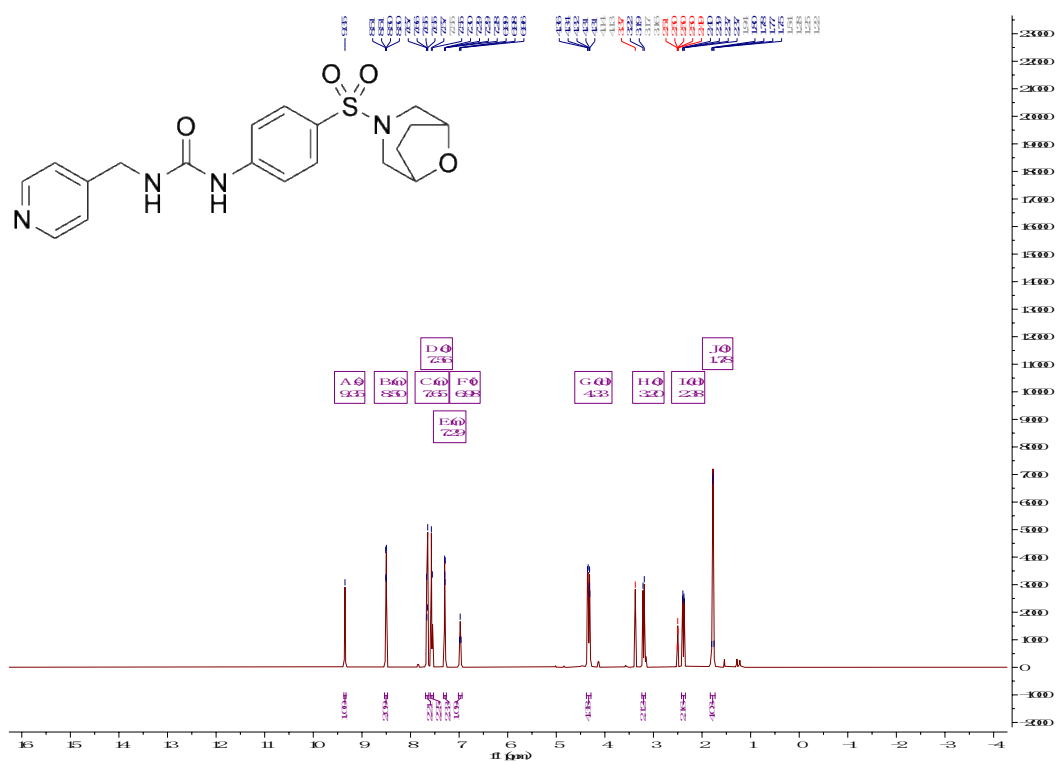

Figure S5. <sup>1</sup>H spectra of compound 6.

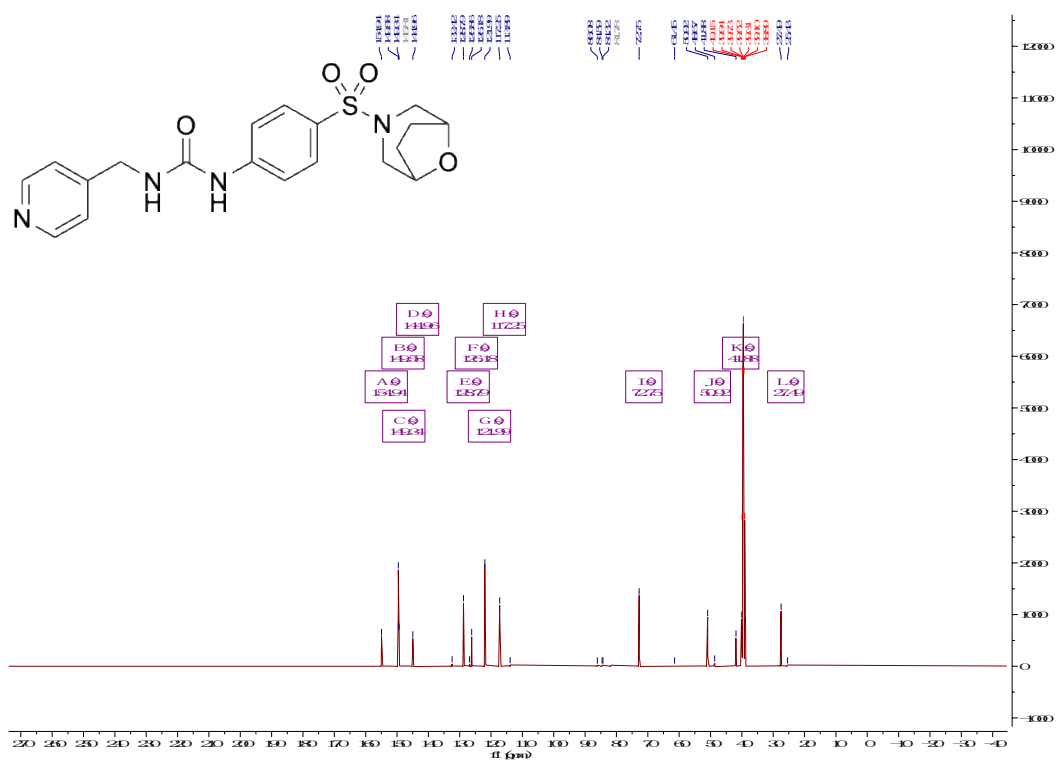

Figure S6. <sup>13</sup>C spectra of compound 6.

1-(4-((8-Oxa-3-azabicyclo[3.2.1]octan-3-yl)sulfonyl)phenyl)-3-(4-(hydroxymethyl)benzyl)urea  
(10)

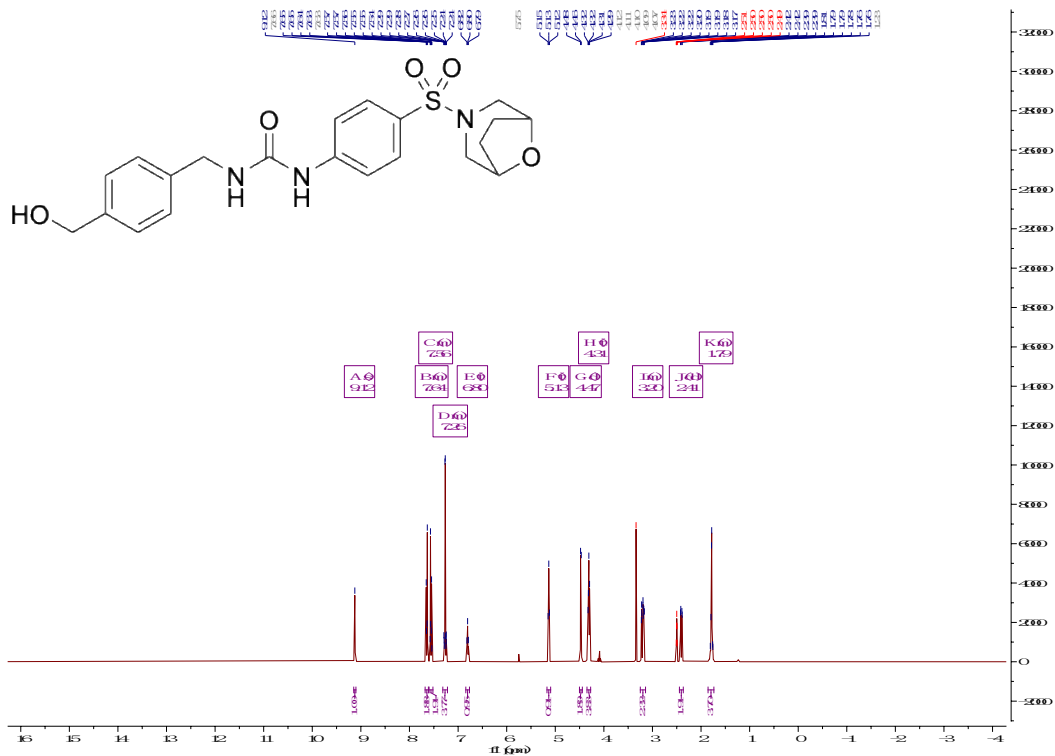

Figure S7. <sup>1</sup>H spectra of compound 10.

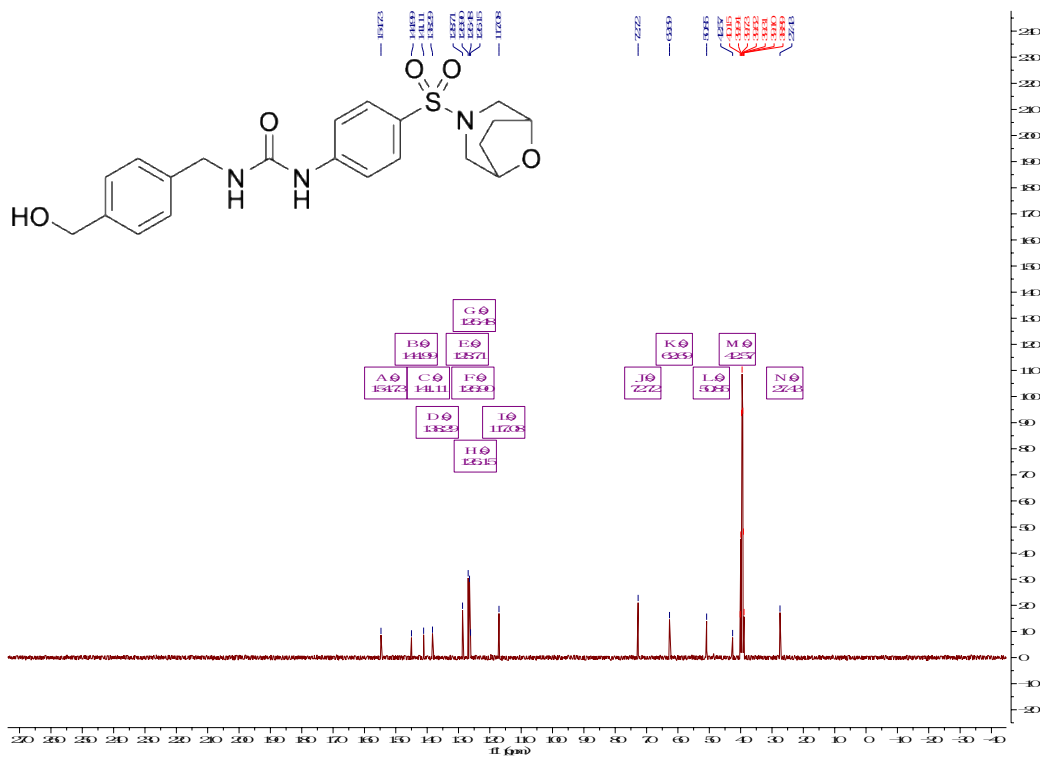

Figure S8. <sup>13</sup>C spectra of compound 10.

2-((6-Azidohexyl)oxy)-1,1'-biphenyl (12)

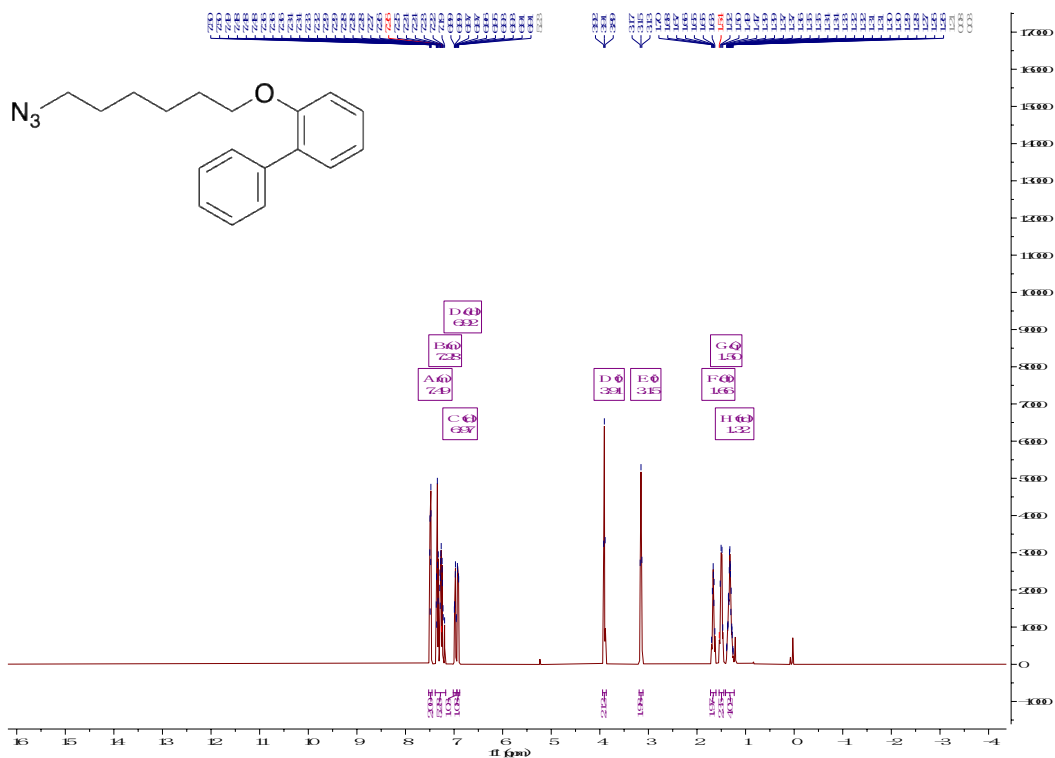

Figure S9.  $^1\text{H}$  spectra of compound 12.

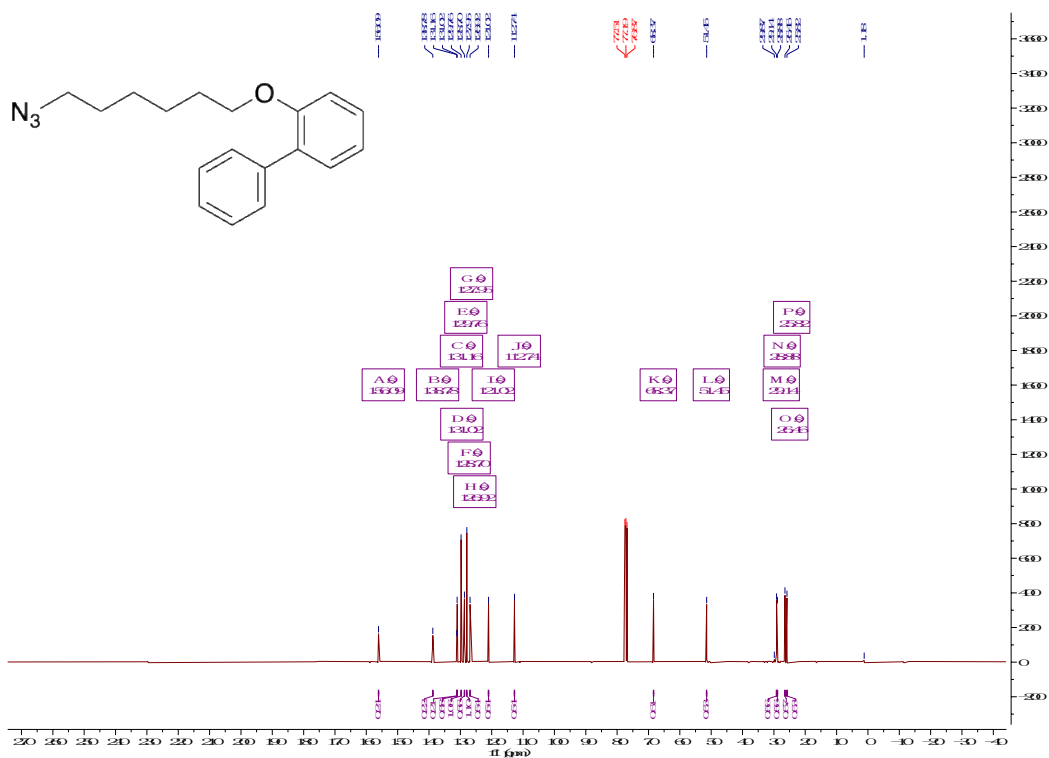

Figure S10.  $^{13}\text{C}$  spectra of compound 12.

### 4-(1-(6-([1,1'-Biphenyl]-2-yloxy)hexyl)-1H-1,2,3-triazol-4-yl)pyridine (8)

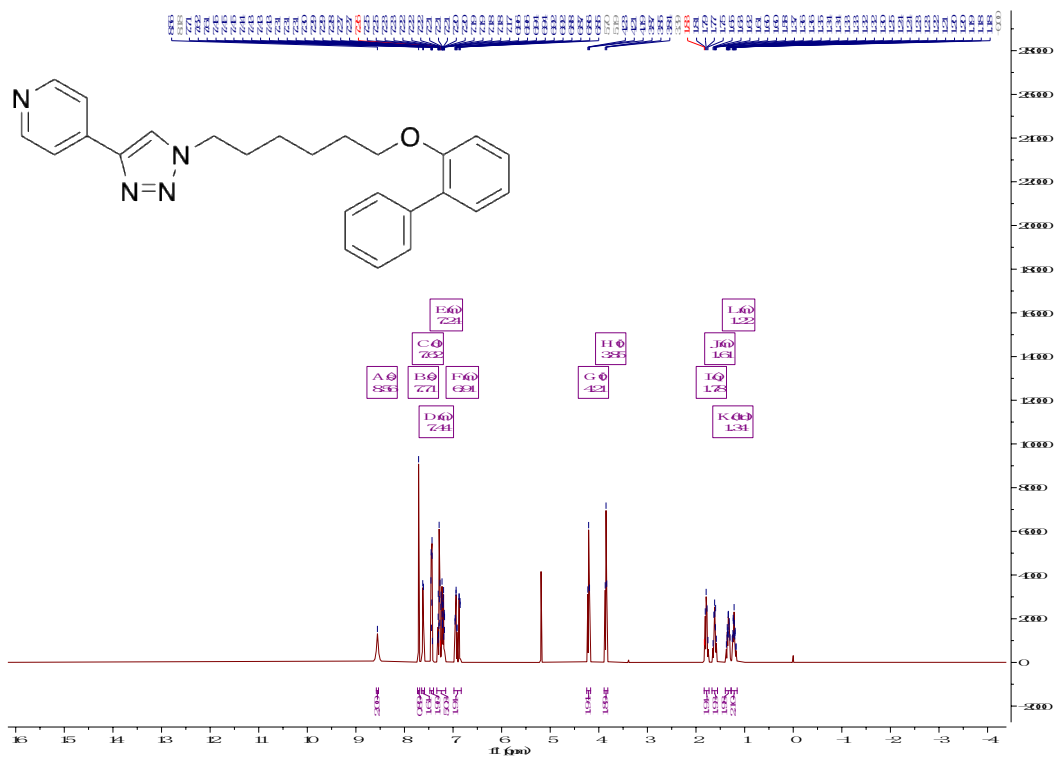

Figure S11. <sup>1</sup>H spectra of compound 8.

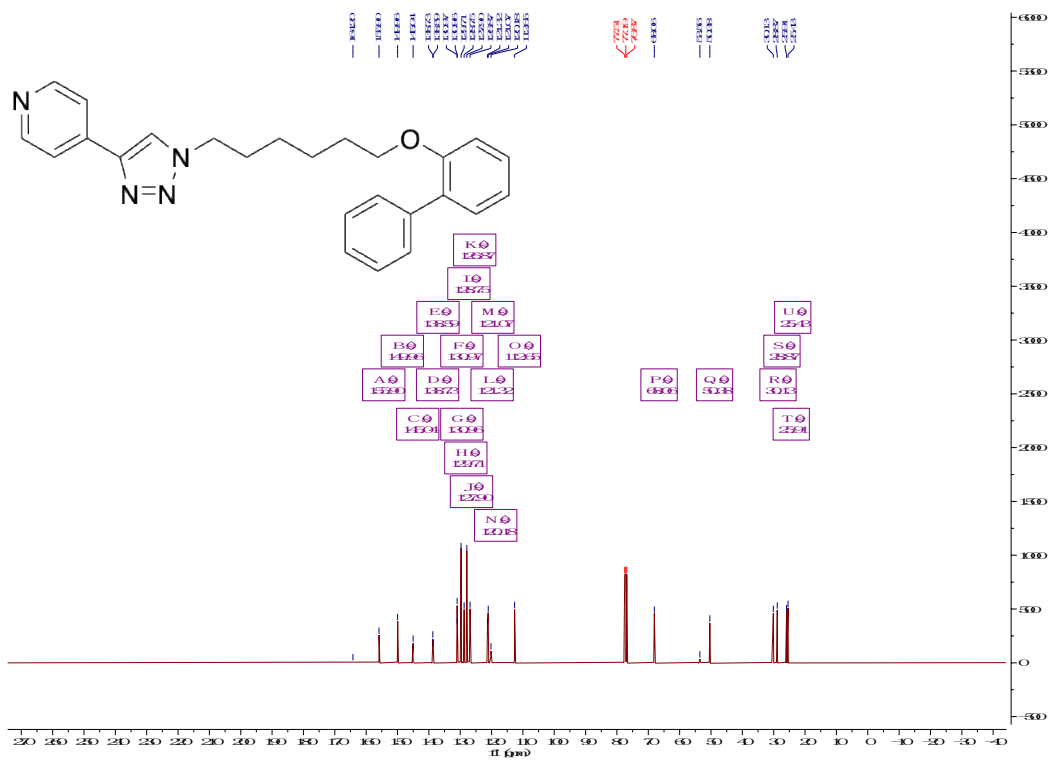

Figure S12. <sup>13</sup>C spectra of compound 8.

(4-(4-Aminobutyl)piperidin-1-yl)(phenyl)methanone (13)

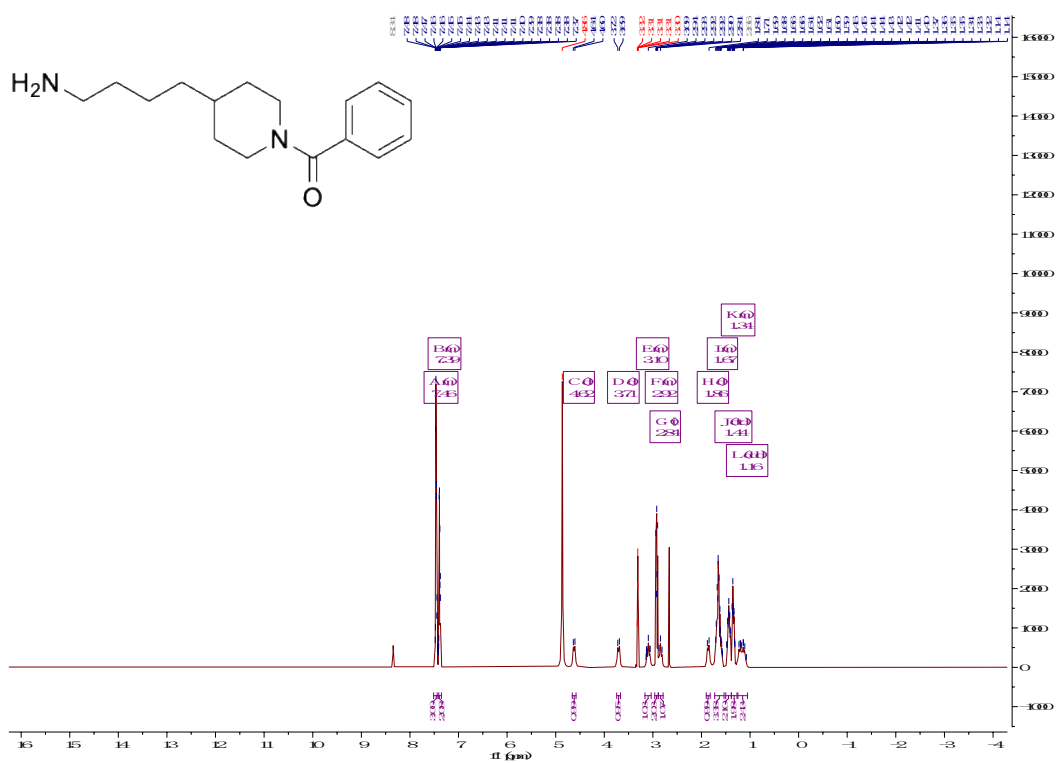

Figure S13. <sup>1</sup>H spectra of compound 13.

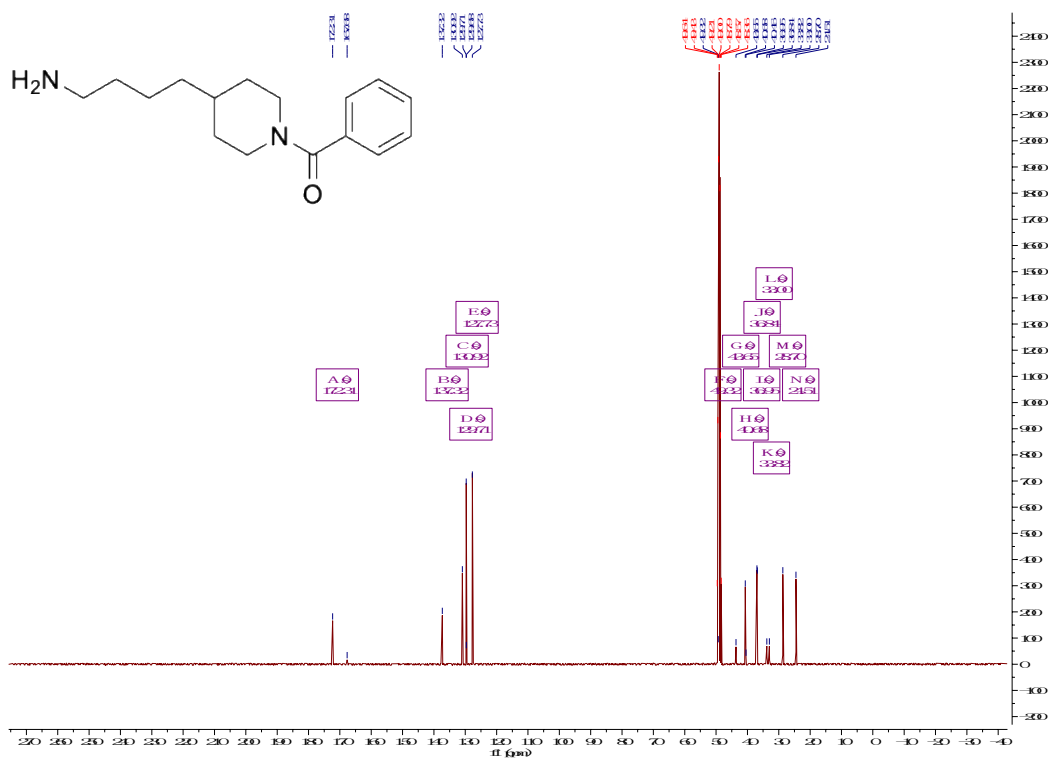

Figure S14. <sup>13</sup>C spectra of compound 13.



**N-(4-(1-Benzoylpiperidin-4-yl)butyl)acrylamide (14)**

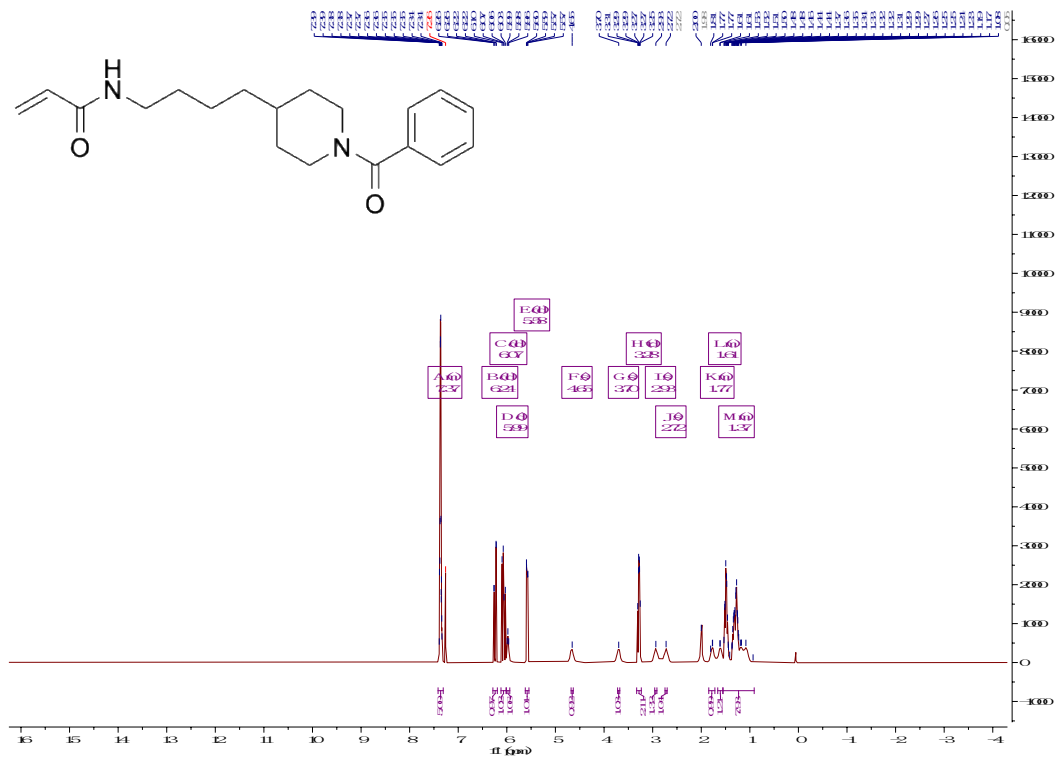

**Figure S15. <sup>1</sup>H spectra of compound 14.**

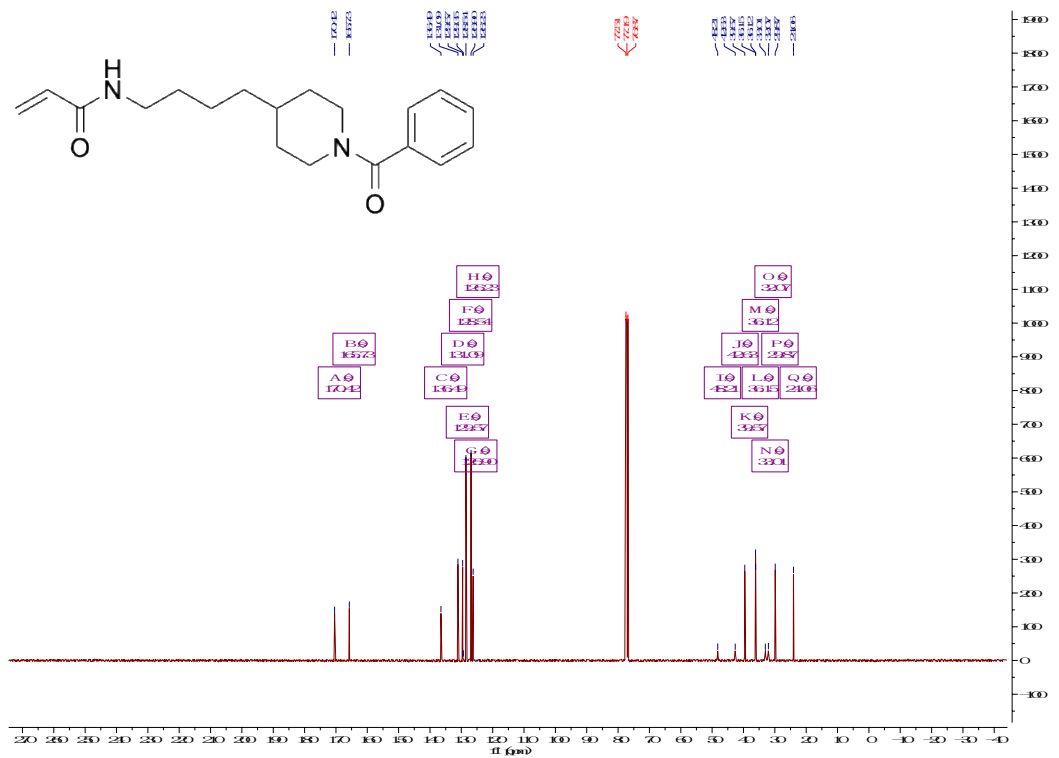

**Figure S16. <sup>13</sup>C spectra of compound 14.**

(E)-N-(4-(1-Benzoylpiperidin-4-yl)butyl)-3-(pyridin-4-yl)acrylamide (7)

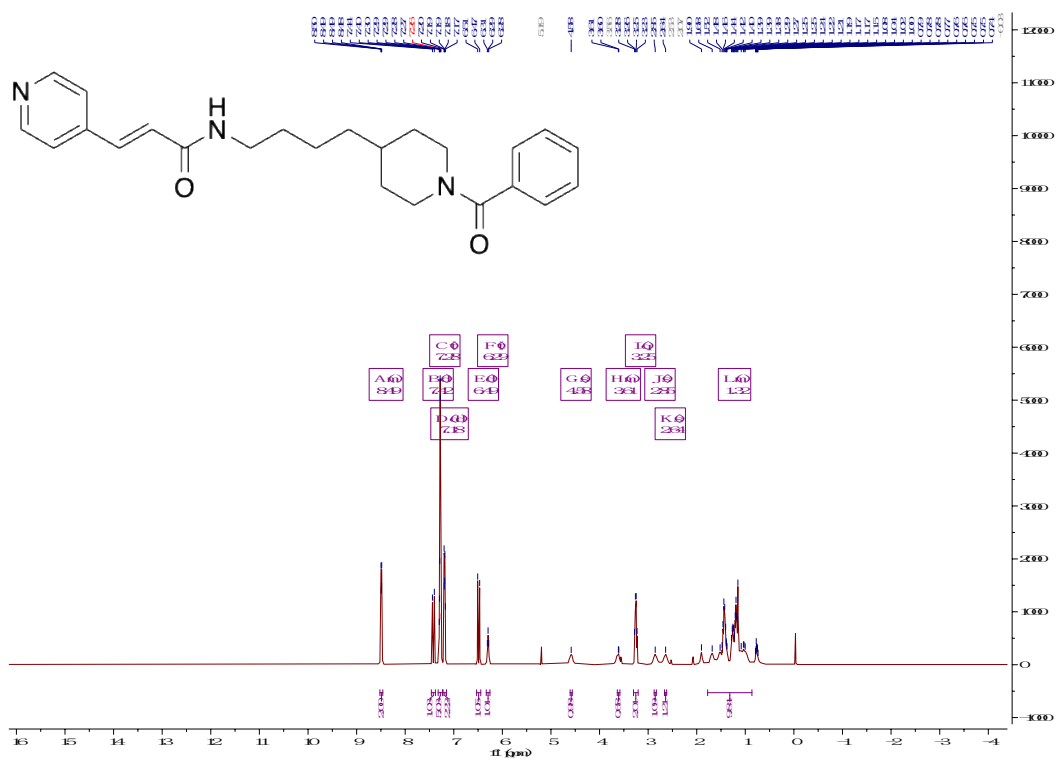

Figure S17. <sup>1</sup>H spectra of compound 7.

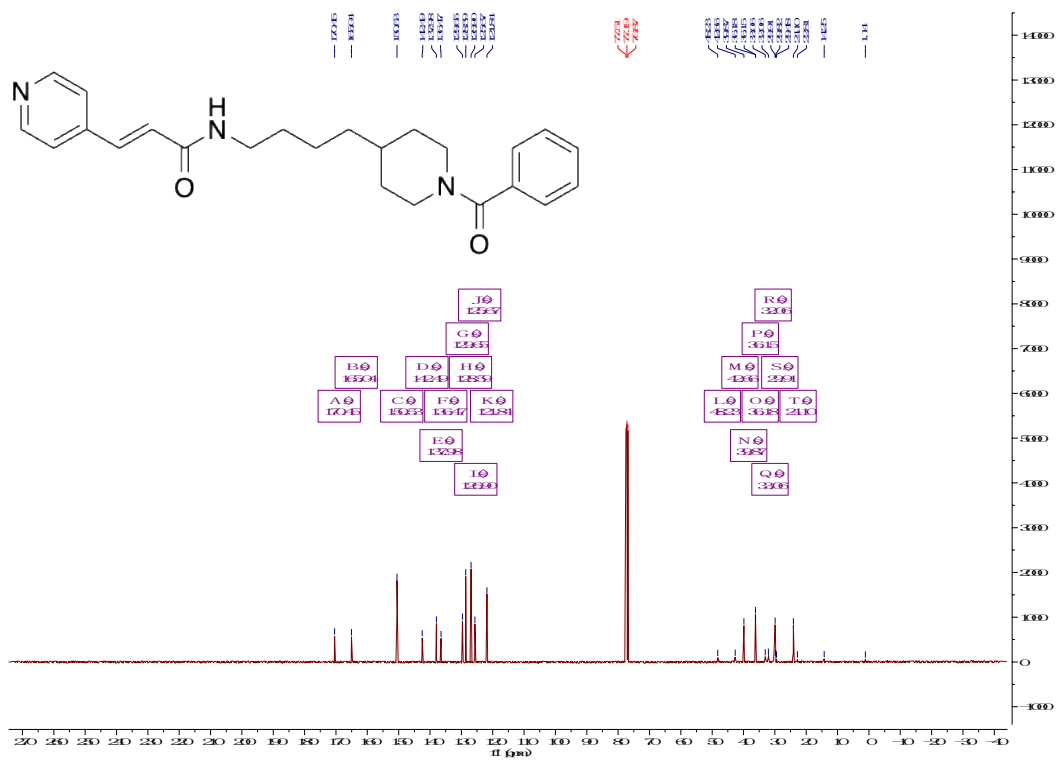

Figure S18. <sup>13</sup>C spectra of compound 7.

4-((2*S*,3*S*,4*R*,5*R*)-3,4-Bis(benzyloxy)-5-((benzyloxy)methyl)tetrahydrofuran-2-yl)benzonitrile  
(19)

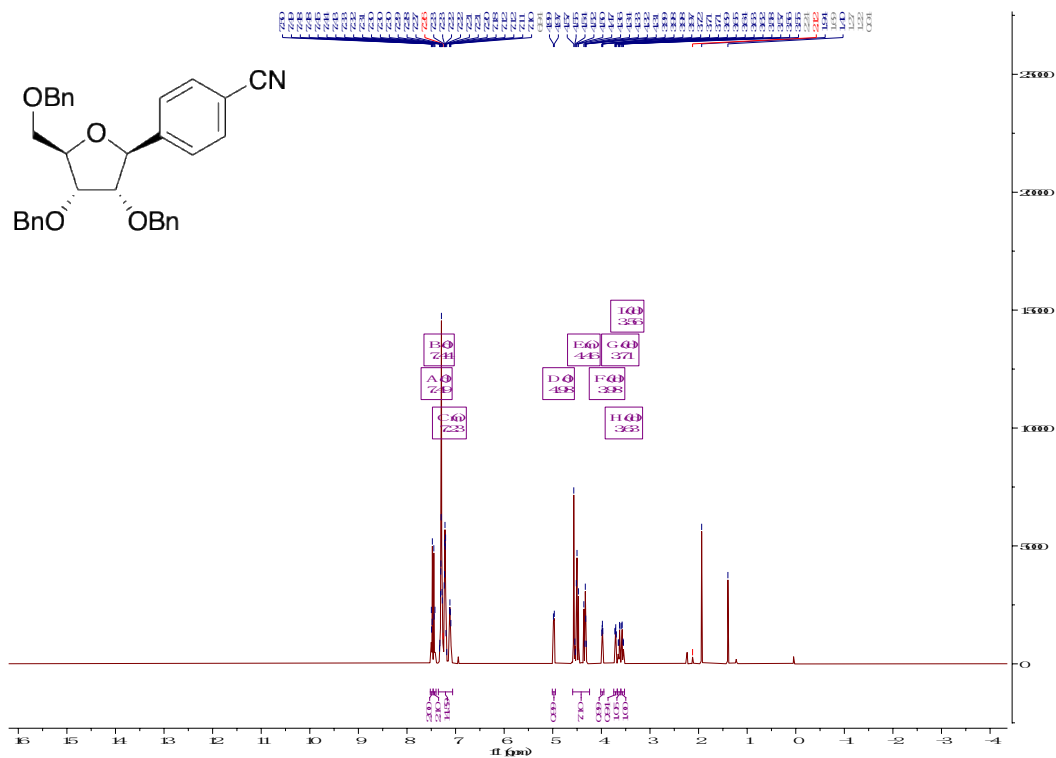

Figure S19. <sup>1</sup>H spectra of compound 19.

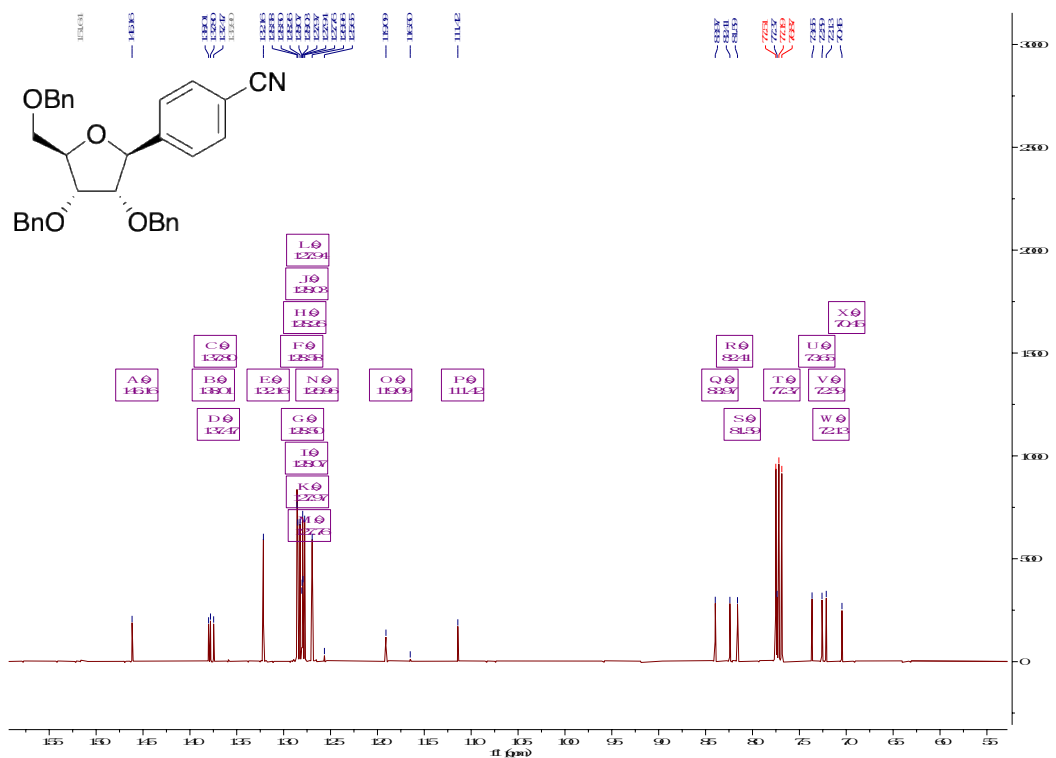

Figure S20. <sup>13</sup>C spectra of compound 19.

4-((2*S*,3*R*,4*S*,5*R*)-3,4-Dihydroxy-5-(hydroxymethyl)tetrahydrofuran-2-yl)benzointrile (20)

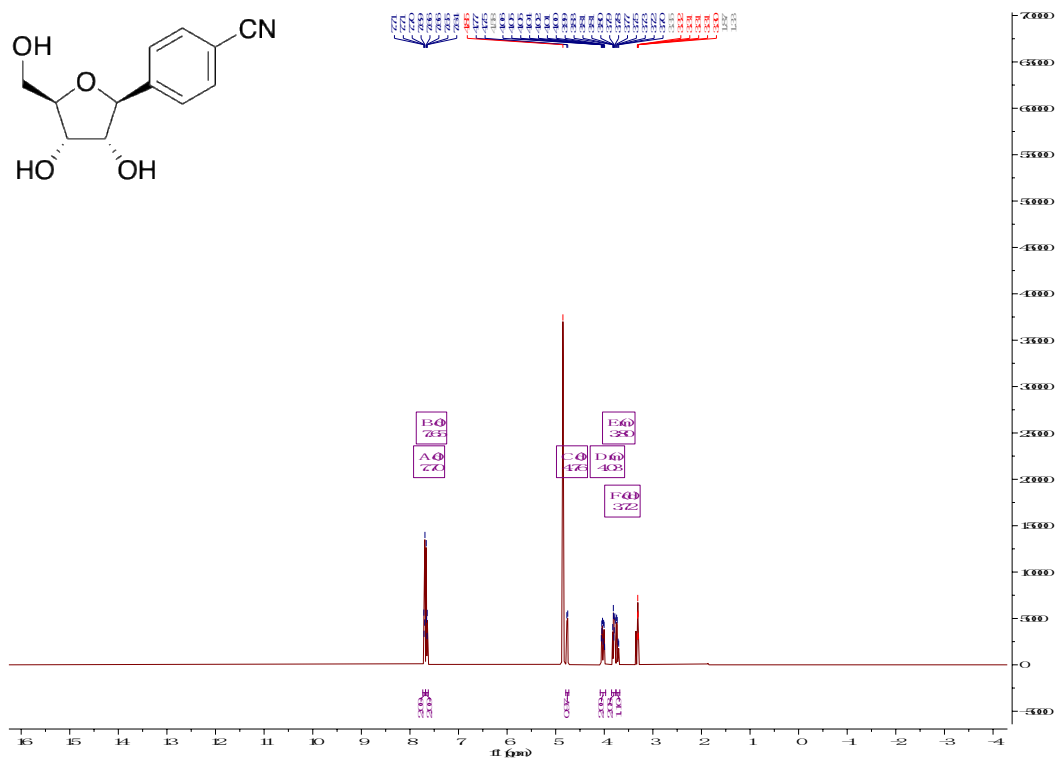

Figure S21. <sup>1</sup>H spectra of compound 20.

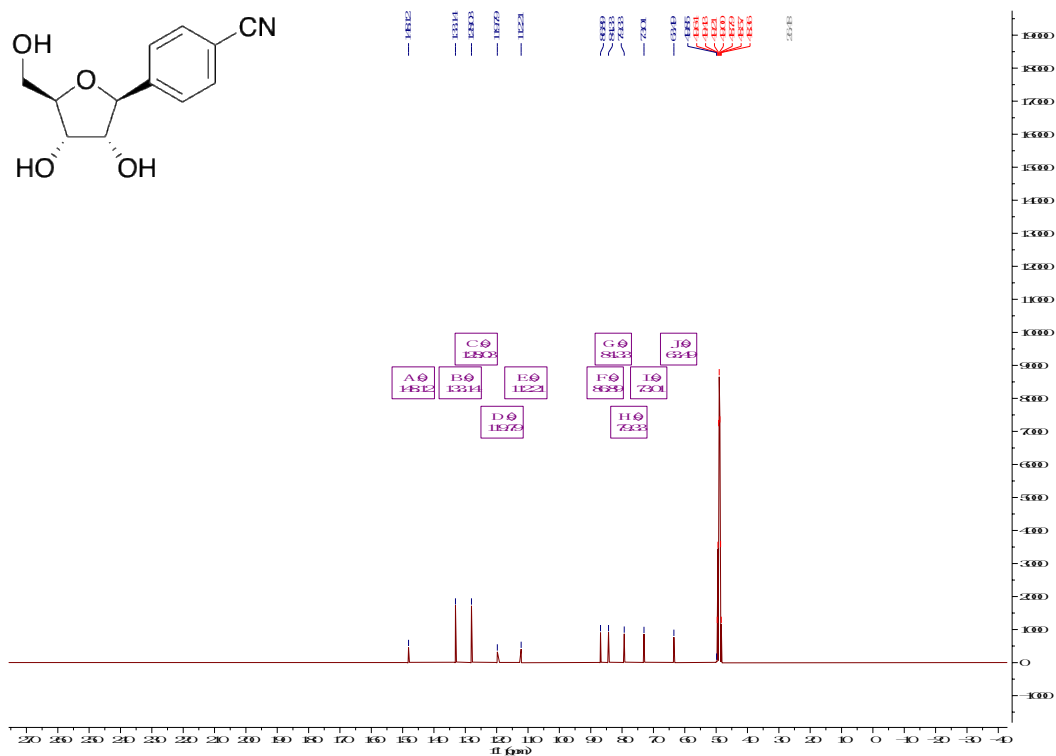

Figure S22. <sup>13</sup>C spectra of compound 20.

4-((3a*S*,4*S*,6*R*,6a*R*)-6-(Hydroxymethyl)-2,2-dimethyltetrahydrofuro[3,4-*d*][1,3]dioxol-4-yl)benzonitrile (21)

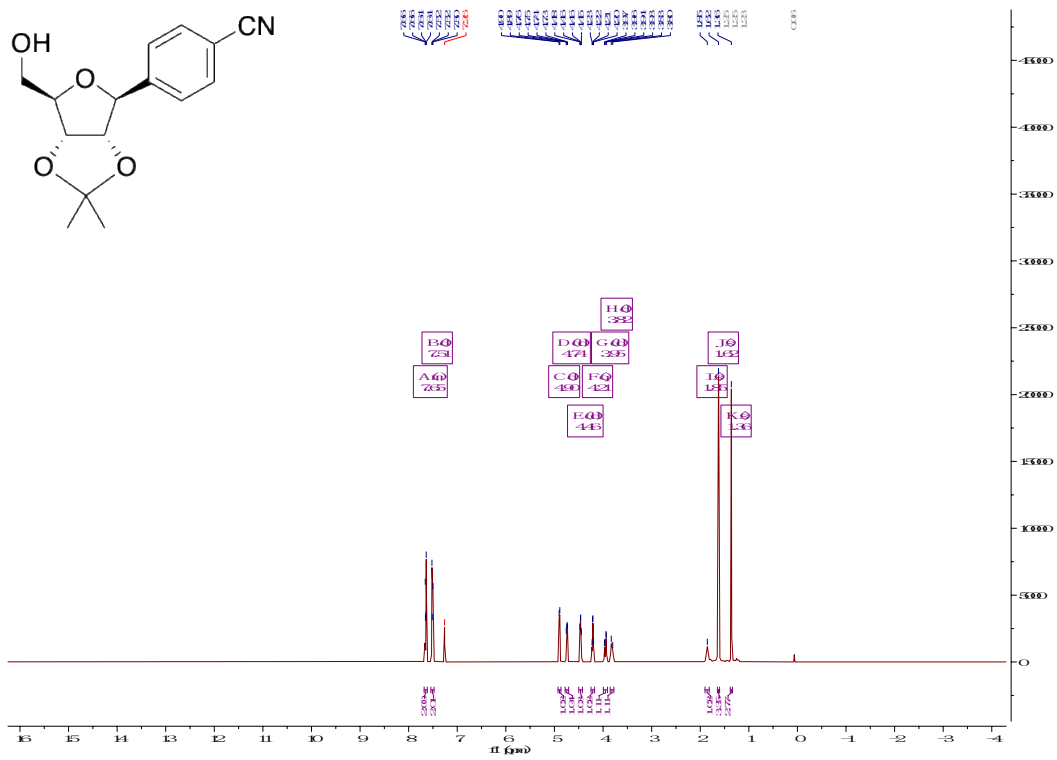

Figure S23. <sup>1</sup>H spectra of compound 21.

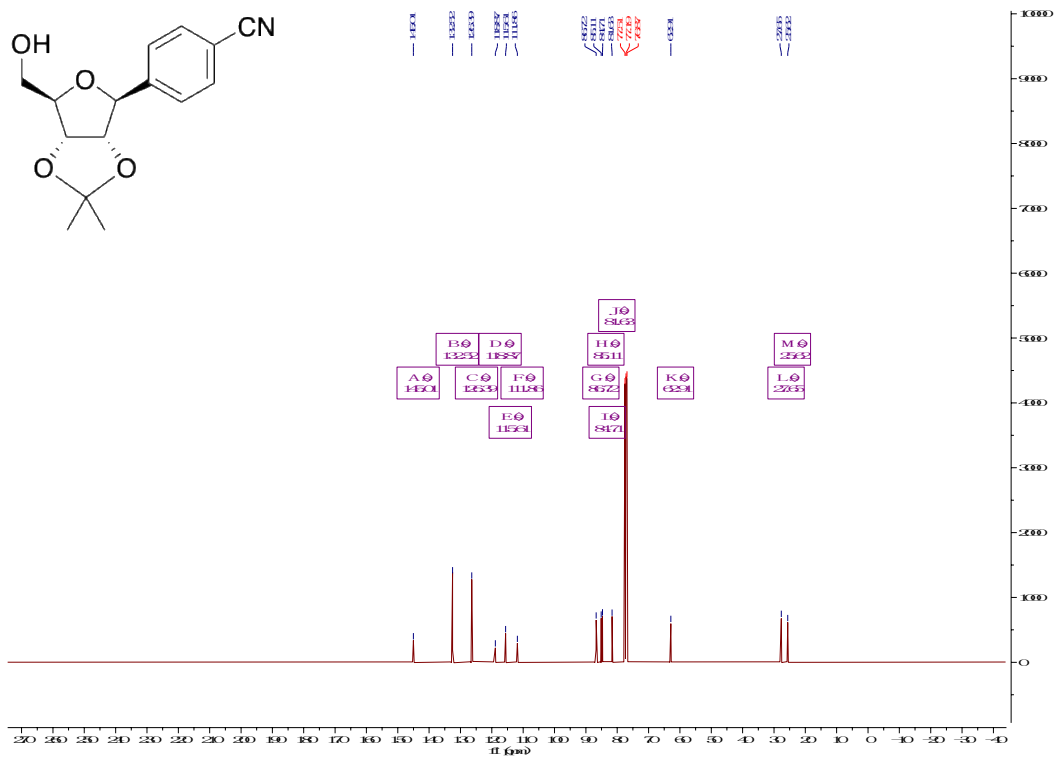

Figure S24. <sup>13</sup>C spectra of compound 21.

**((3aR,4R,6S,6aS)-6-(4-Cyanophenyl)-2,2-dimethyltetrahydrofuro[3,4-d][1,3]dioxol-4-yl)methyl diethyl phosphate (22)**

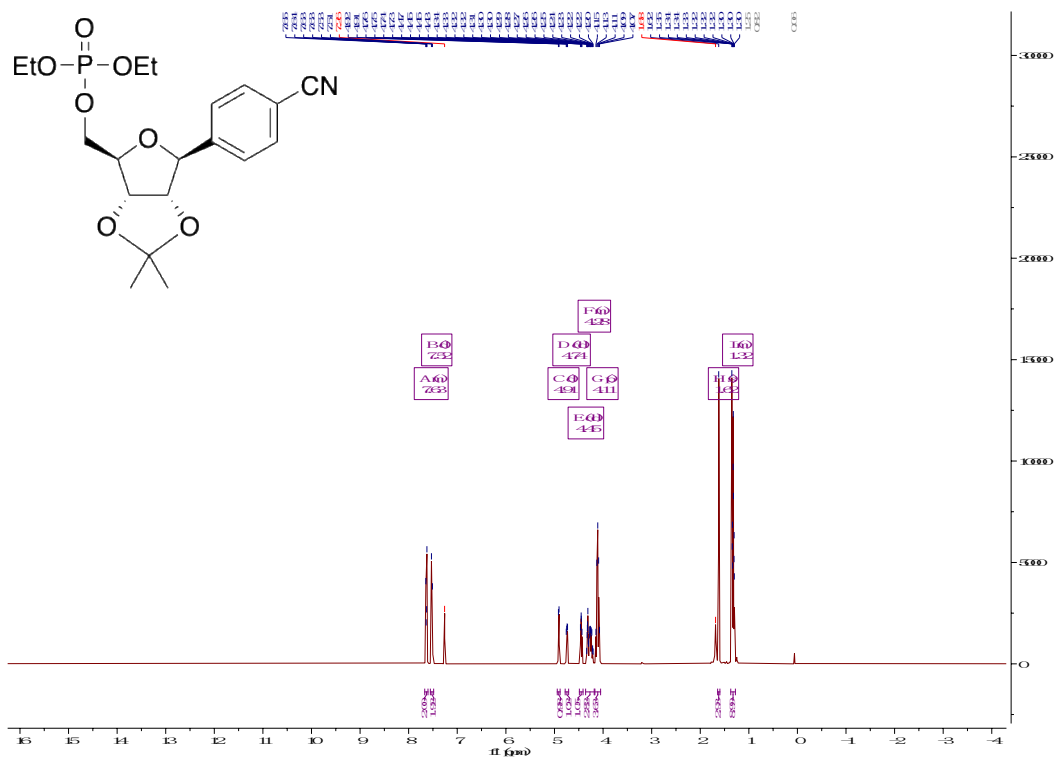

Figure S25. <sup>1</sup>H spectra of compound 22.

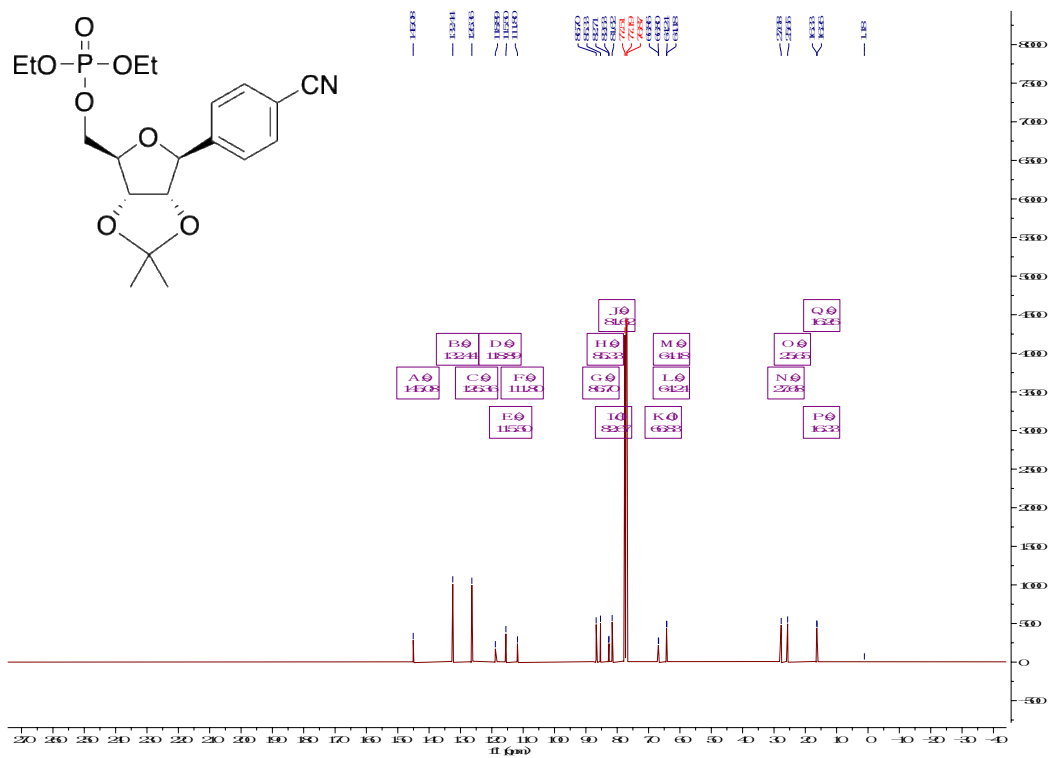

Figure S26. <sup>13</sup>C spectra of compound 22.

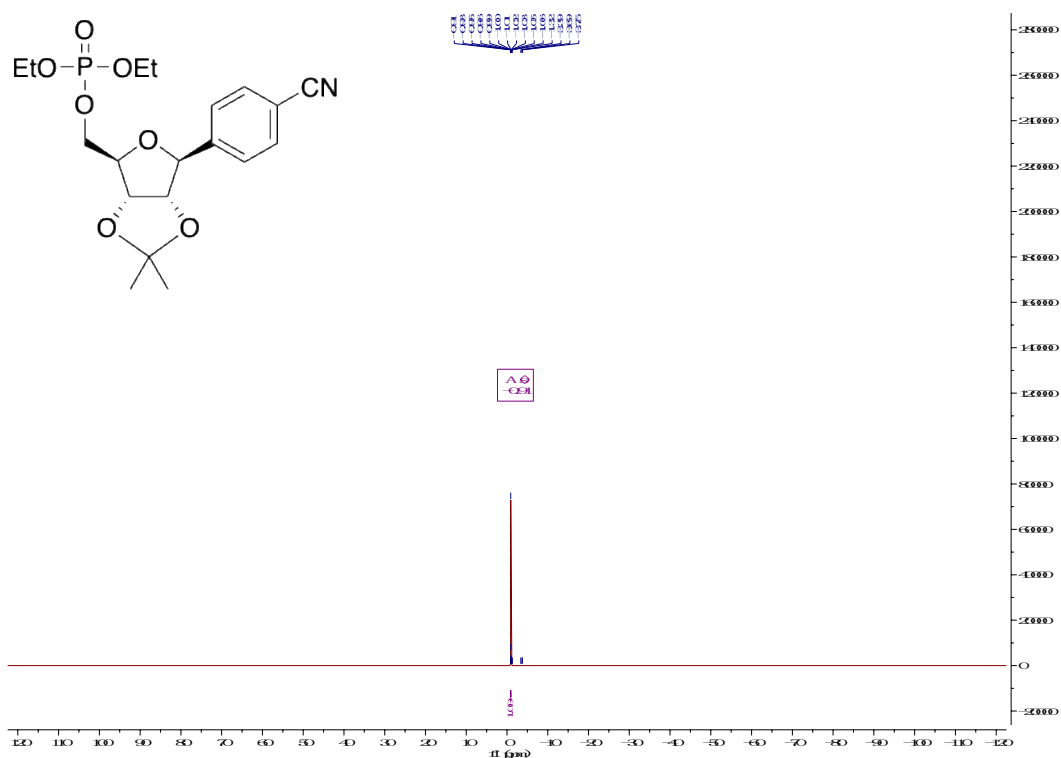

Figure S27.  $^{31}\text{P}$  spectra of compound 22.

**((3aR,4R,6S,6aS)-2,2-Dimethyl-6-(4-((3-(4-(phenylsulfonyl)phenyl)ureido)methyl)phenyl)tetrahydrofuro[3,4-d][1,3]dioxol-4-yl)methyl diethyl phosphate (24a)**

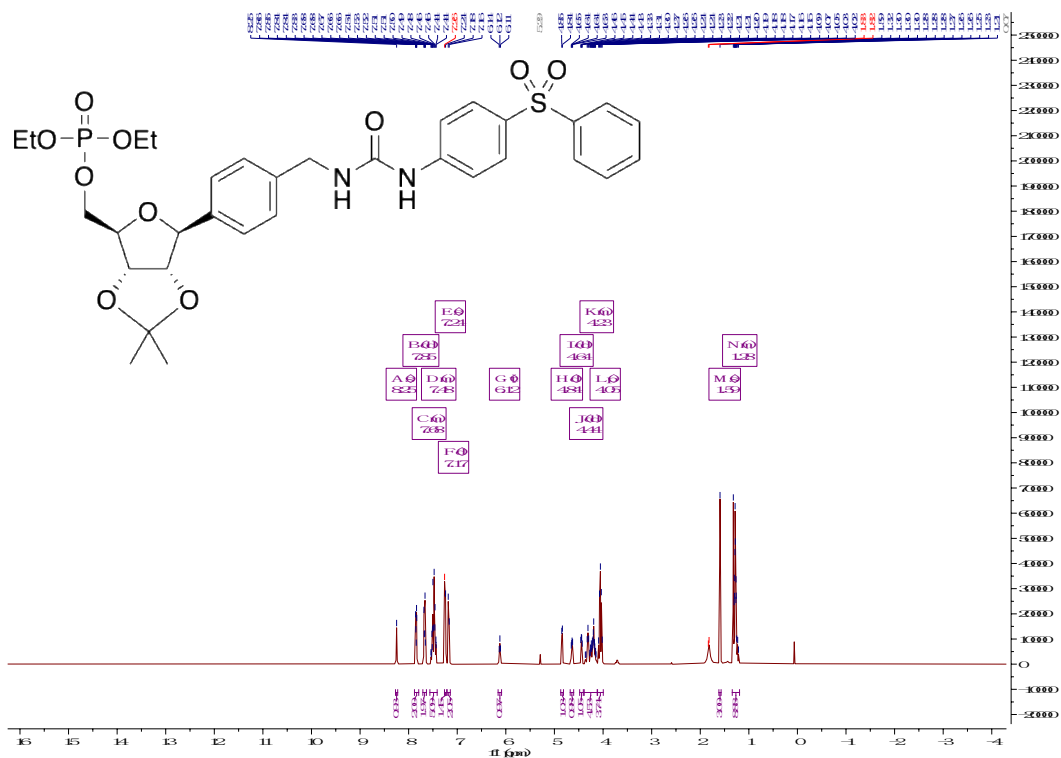

Figure S28.  $^1\text{H}$  spectra of compound 24a.

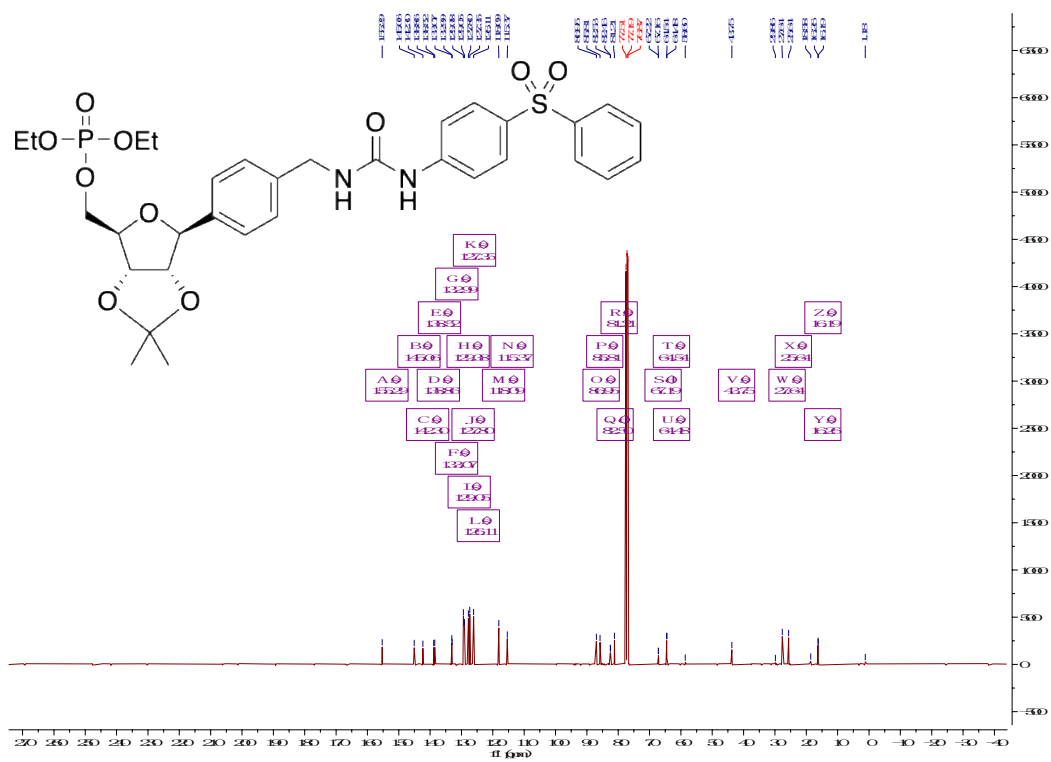

Figure S29. <sup>13</sup>C spectra of compound 24a.

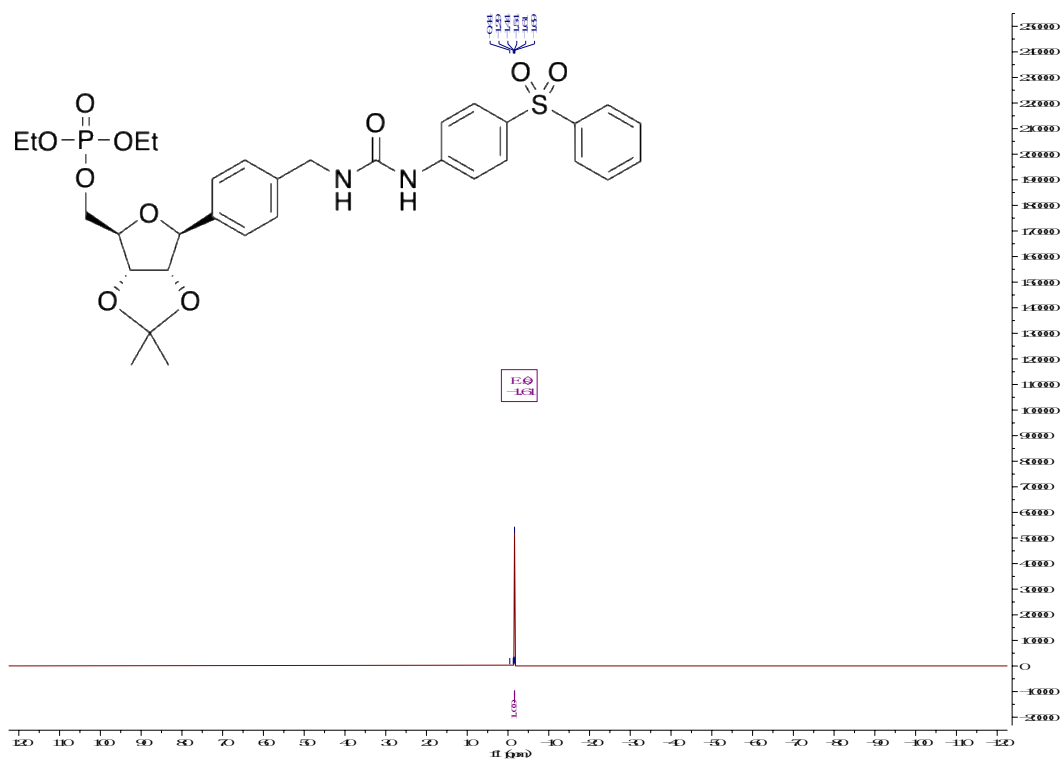

Figure S30. <sup>31</sup>P spectra of compound 24a.



**((2*R*,3*S*,4*R*,5*S*)-3,4-Dihydroxy-5-(4-((3-(4-(phenylsulfonyl)phenyl)ureido)methyl)phenyl)tetrahydrofuran-2-yl)methyl dihydrogen phosphate (9a)**

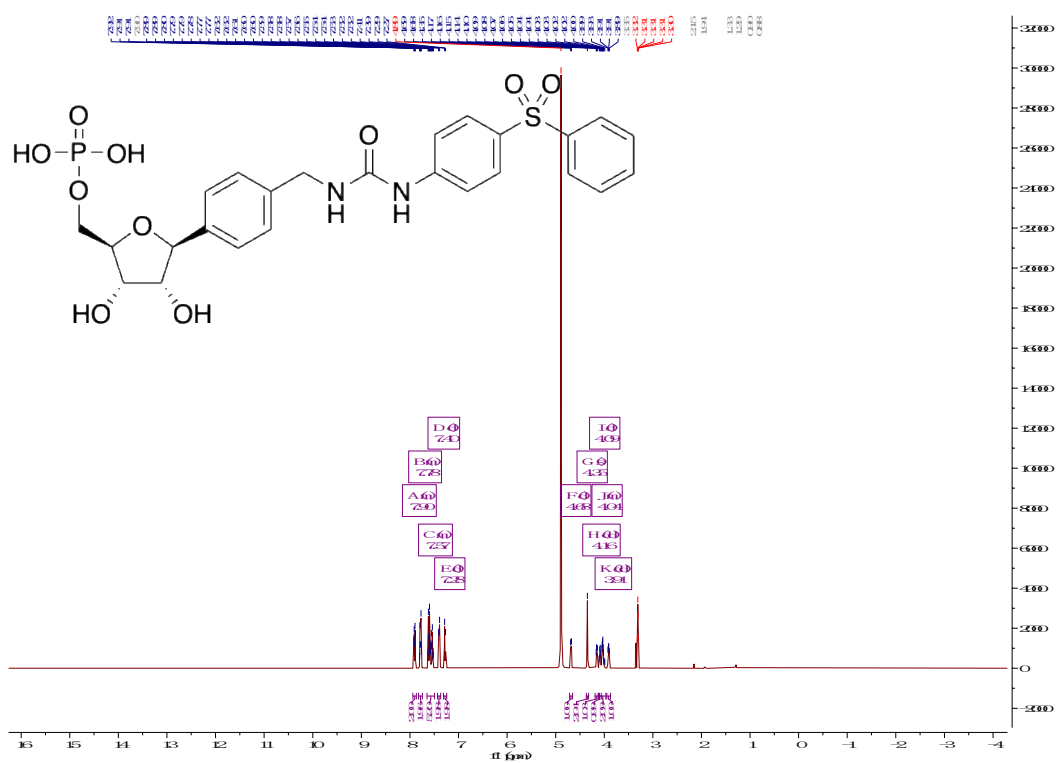

Figure S31. <sup>1</sup>H spectra of compound 9a.

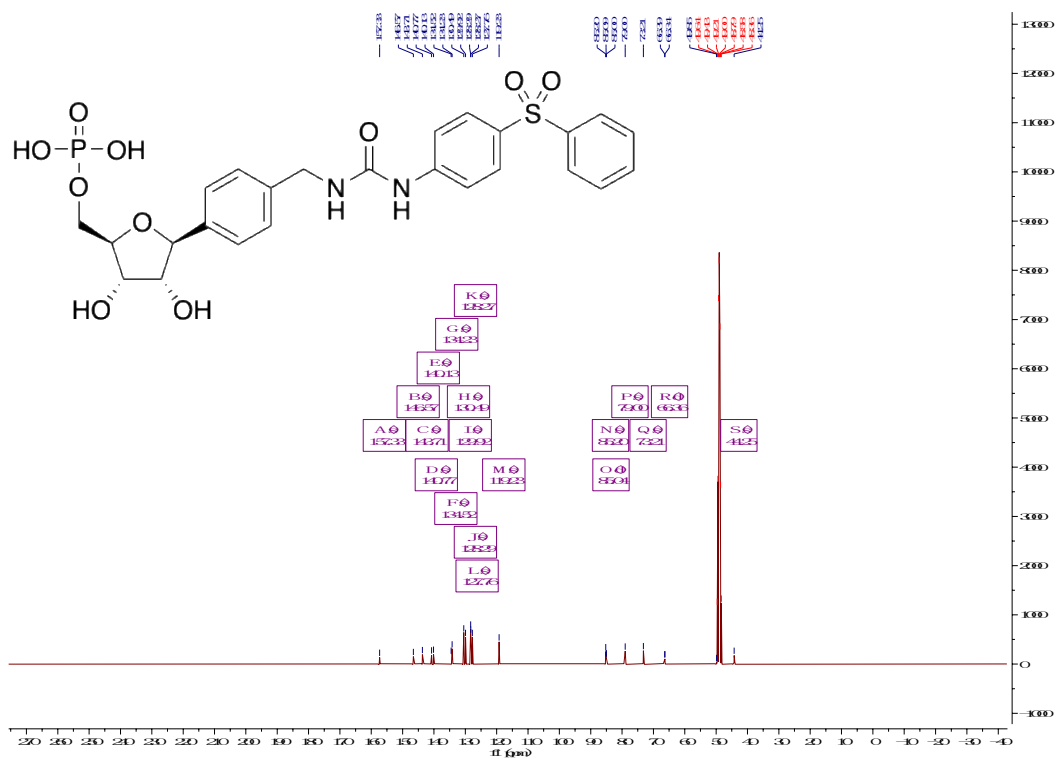

Figure S32. <sup>13</sup>C spectra of compound 9a.

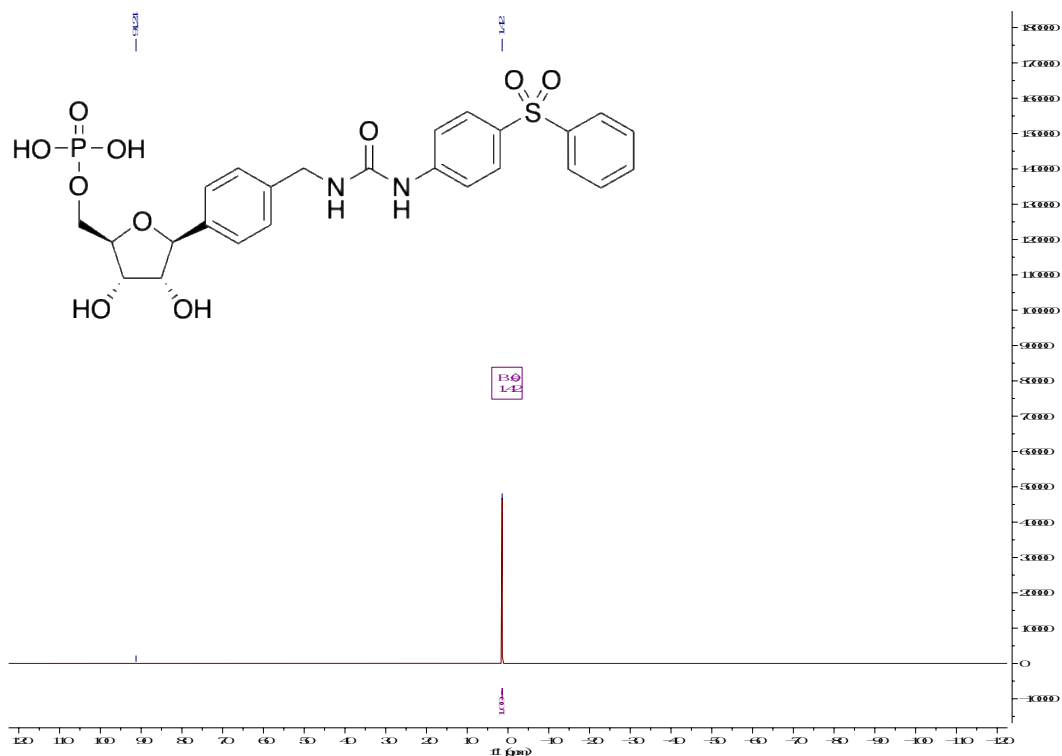

Figure S33.  $^{31}\text{P}$  spectra of compound 9a.

**((3aR,4R,6S,6aS)-6-(4-((3-(4-((8-Oxa-3-azabicyclo[3.2.1]octan-3-yl)sulfonyl)phenyl)ureido)methyl)phenyl)-2,2-dimethyltetrahydrofuro[3,4-d][1,3]dioxol-4-yl)methyldiethylphosphate (24b)**

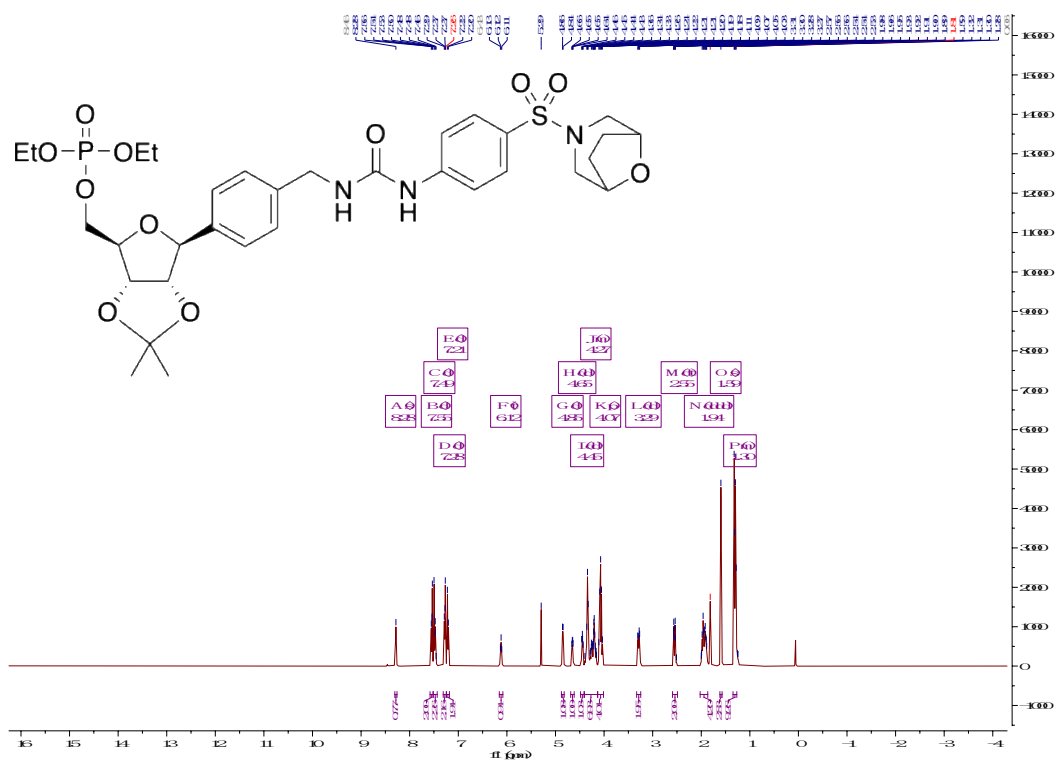

Figure S34.  $^1\text{H}$  spectra of compound 24b.

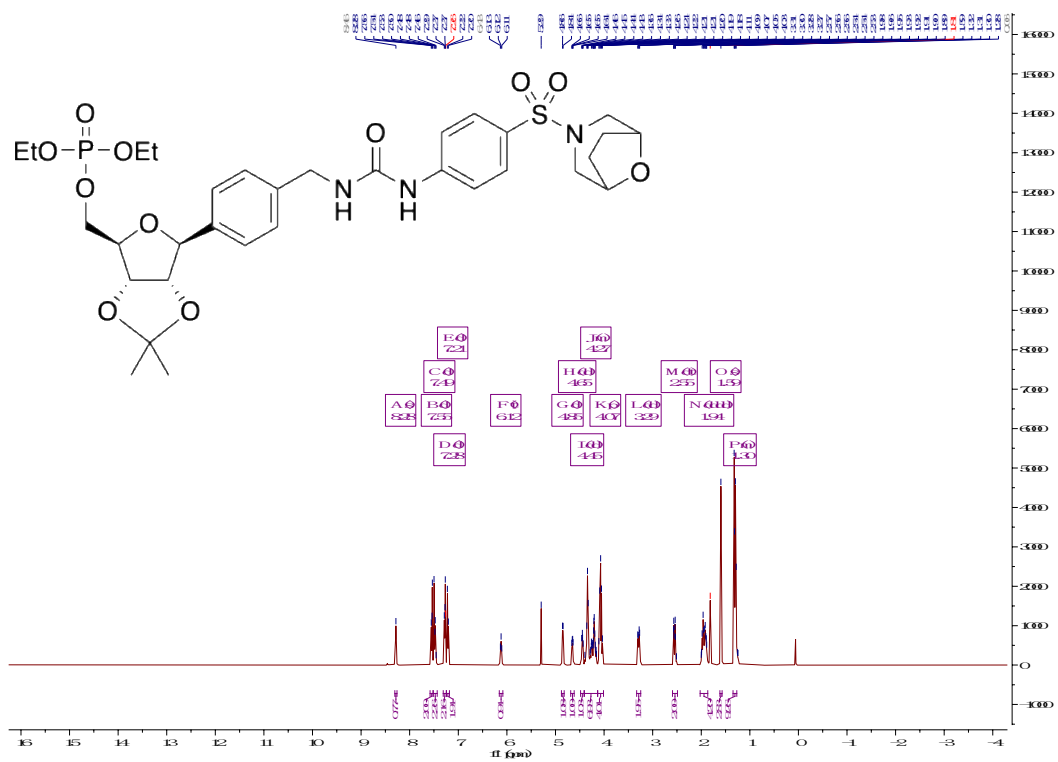

Figure S35.  $^{13}\text{C}$  spectra of compound 24b.

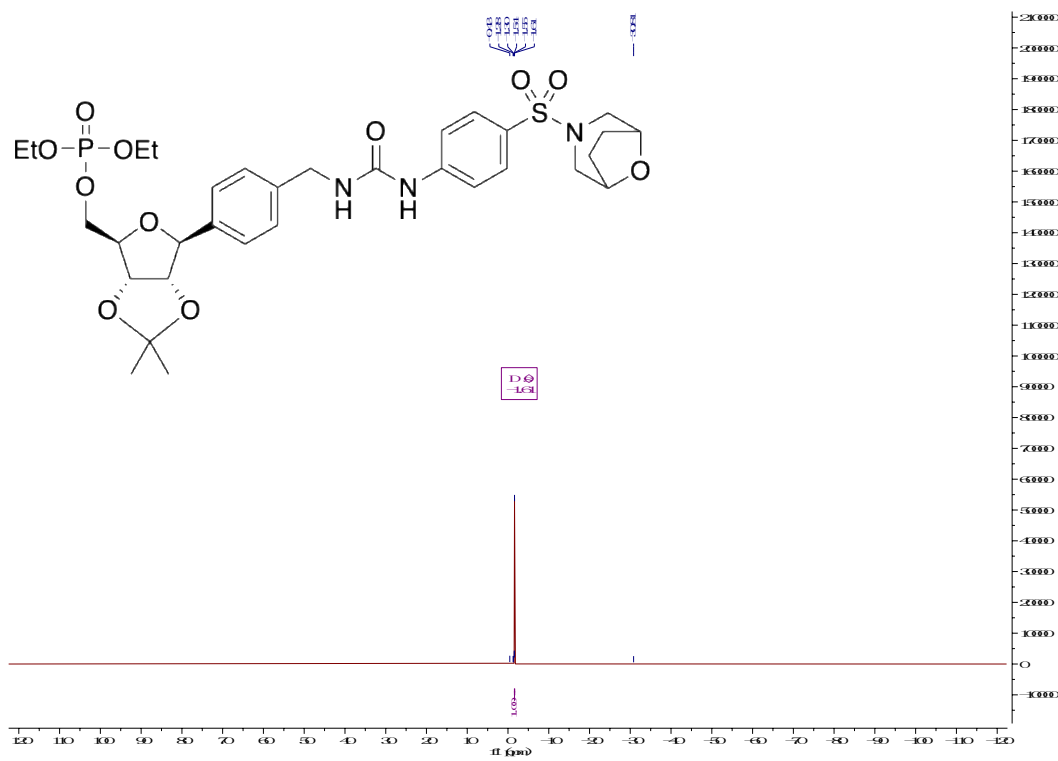

Figure S36.  $^{31}\text{P}$  spectra of compound 24b.

**((2*R*,3*S*,4*R*,5*S*)-5-(4-((3-(4-((8-Oxa-3-azabicyclo[3.2.1]octan-3-yl)sulfonyl)phenyl)ureido)methyl)phenyl)-3,4-dihydroxytetrahydrofuran-2-yl)methyl dihydrogen phosphate (9b)**

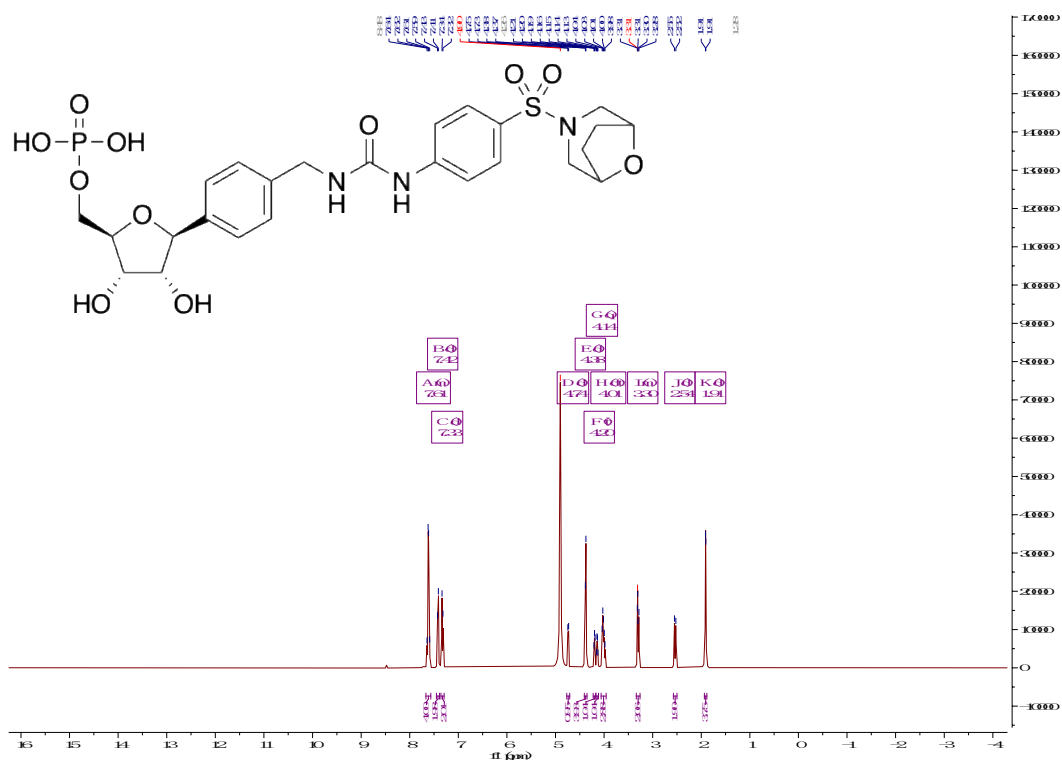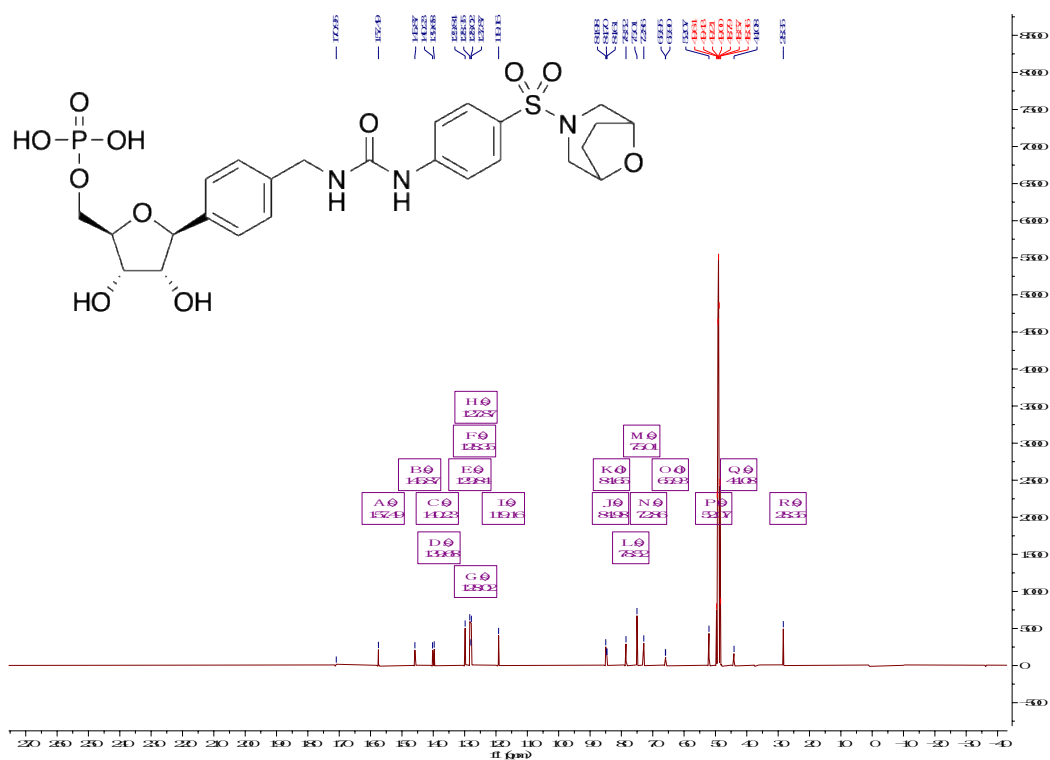

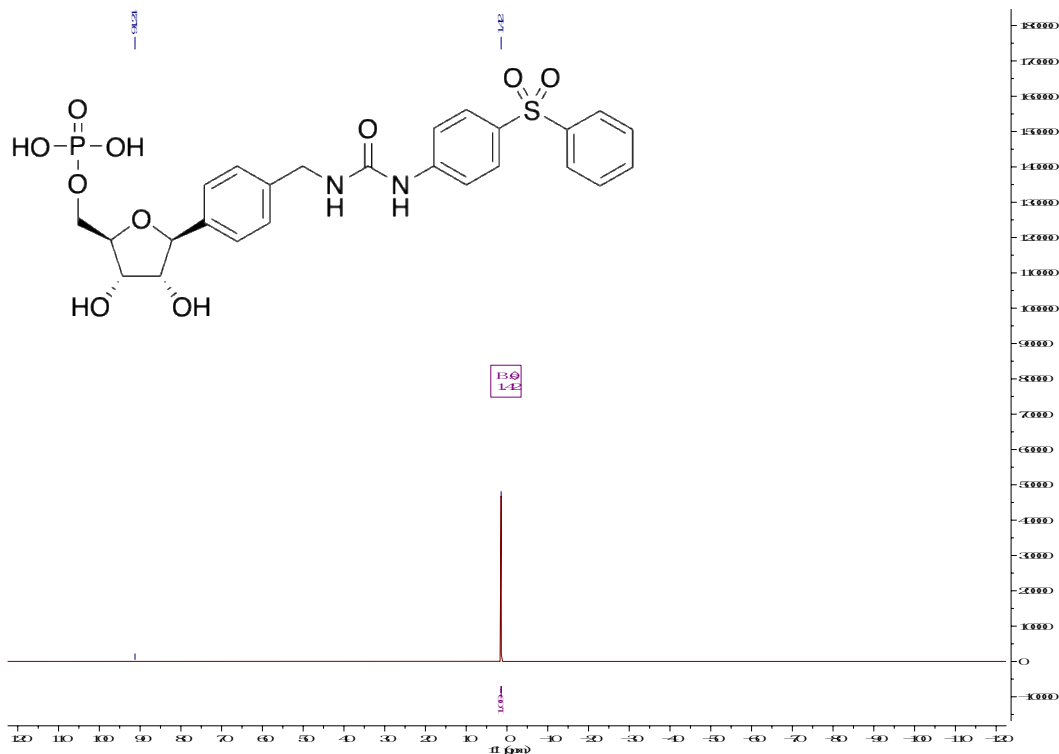

Figure S39. <sup>31</sup>P spectra of compound 9b.

LC spectra

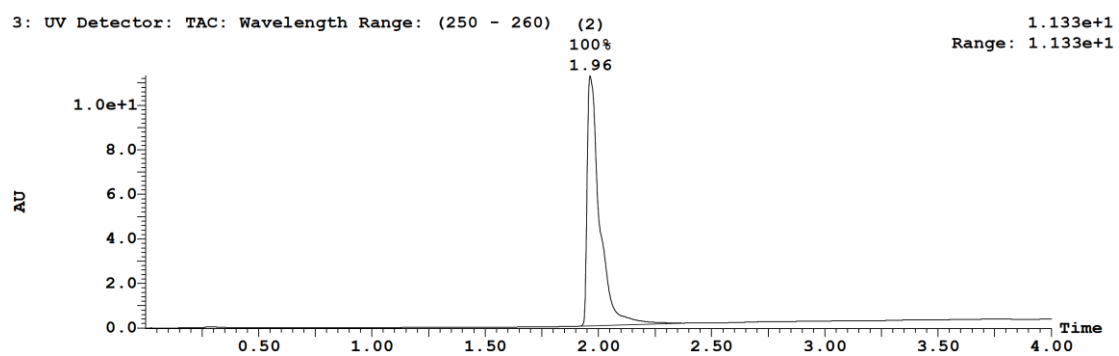

Figure S40. LC spectra of compound 6.

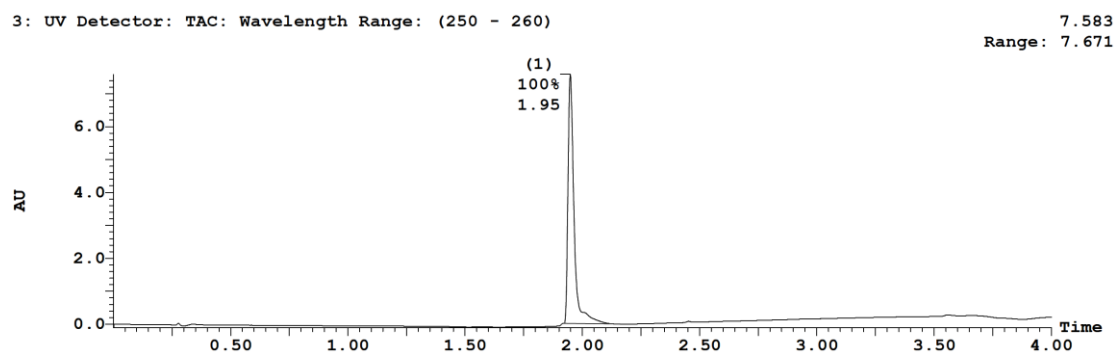

Figure S41. LC spectra of compound 7.

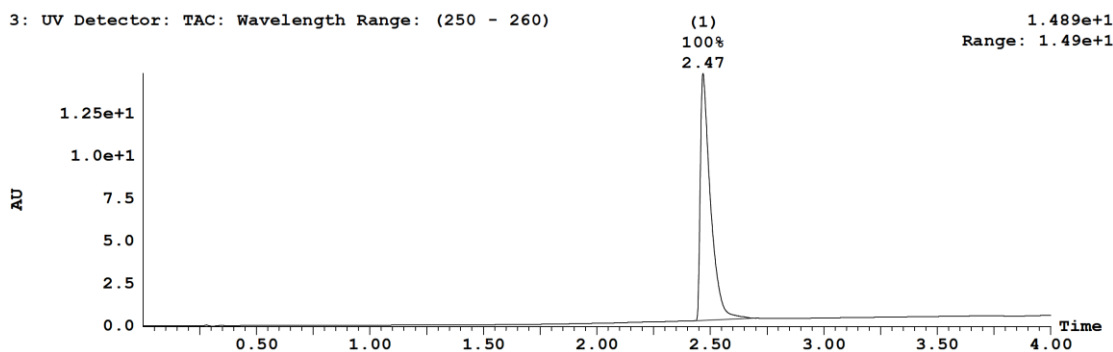

Figure S42. LC spectra of compound 8.

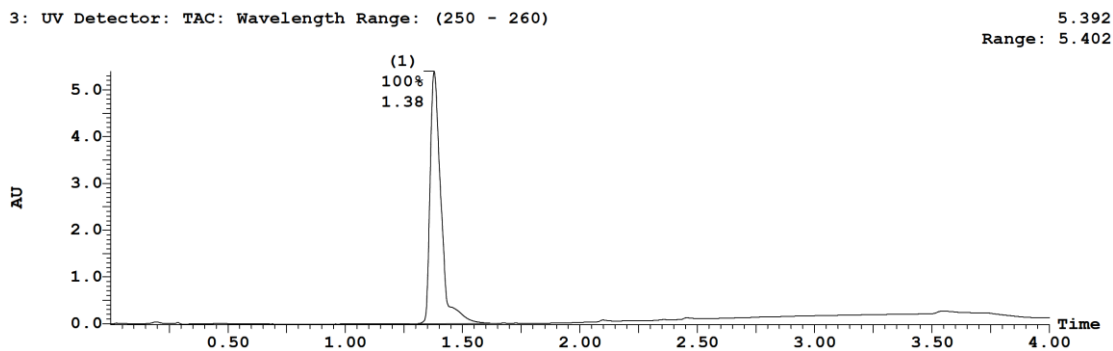

Figure S43. LC spectra of compound 9a.

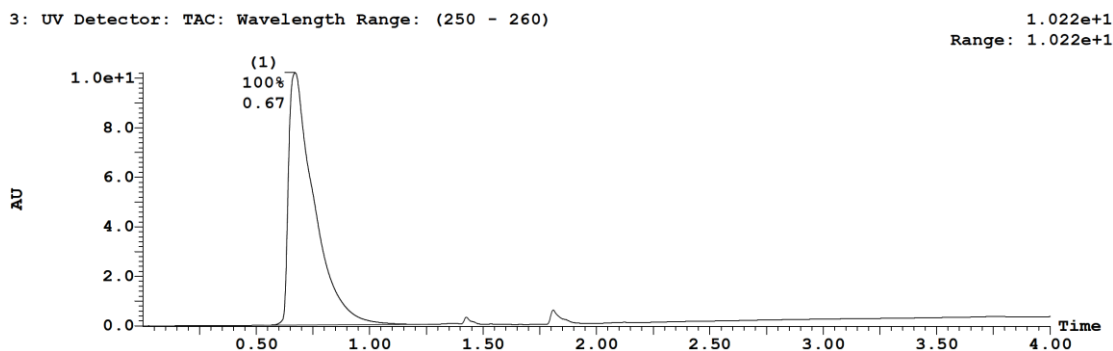

Figure S44. LC spectra of compound 9b.

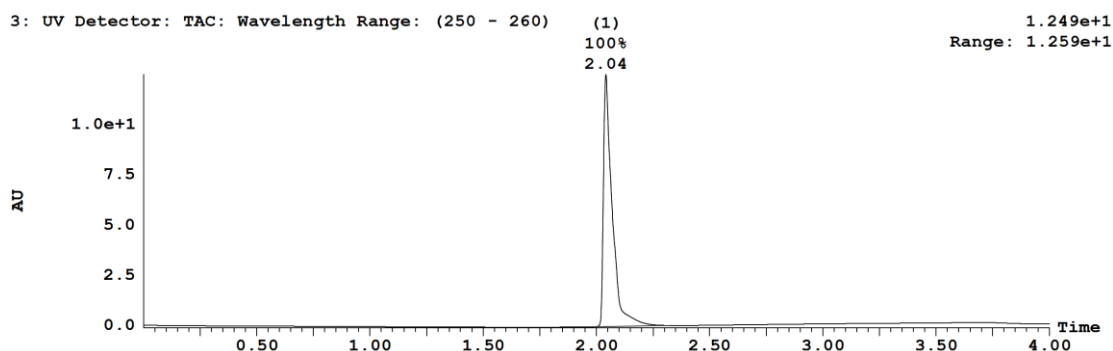

Figure S45. LC spectra of compound 10.

### Data collection, structure solution and refinement

Diffraction data were collected at beamline X06SA (Villigen, CH) at a wavelength of 1.0 Å at 100 K. The reservoir condition supplemented with 20% ethylene glycol was used as cryoprotectant. Data were

processed using XDS<sup>1</sup> and scaled with aimless.<sup>2</sup> The PDB structure with the accession code 2GVL was used as an initial search model using the program MOLREP.<sup>3</sup> The final model was built manually using Coot<sup>4</sup> and refined with REFMAC5.<sup>5</sup> Data collection and refinement statistics are summarized in Table S1.

| <b>Data collection</b>                                            | <b>NAMPT-TSY535</b>         |
|-------------------------------------------------------------------|-----------------------------|
| Beamline                                                          | X06SA (SLS)                 |
| Wavelength (Å)                                                    | 0.99999                     |
| Space group                                                       | <i>P</i> 1 2 <sub>1</sub> 1 |
| Cell dimensions                                                   |                             |
| <i>a, b, c</i> (Å)                                                | 61.10, 108.25, 83.69        |
| <i>α, β, γ</i> (°)                                                | 90.00, 97.15, 90.00         |
| Resolution (Å)*                                                   | 46.99–2.15 (2.21–2.15)      |
| unique observations*                                              | 148915 (12209)              |
| <i>R</i> <sub>pim</sub> *                                         | 0.111 (0.314)               |
| Completeness (%)*                                                 | 93.1 (96.8)                 |
| Multiplicity*                                                     | 2.7 (2.6)                   |
| mean <i>I</i> / <i>σI</i> *                                       | 5.8 (2.4)                   |
| CC <sub>1/2</sub> *                                               | 0.964 (0.763)               |
| <b>Refinement</b>                                                 |                             |
| <i>R</i> <sub>work</sub> / <i>R</i> <sub>free</sub>               | 0.228 / 0.266               |
| No. of atoms                                                      | 8204                        |
| overall B-factors (Å <sup>2</sup> )                               | 16.86                       |
| Rms deviations                                                    |                             |
| Bond lengths (Å)                                                  | 0.0026                      |
| Bond angles (°)                                                   | 1.190                       |
| Ramachandran (%)                                                  |                             |
| favoured                                                          | 96.6                        |
| allowed                                                           | 3.4                         |
| outlier                                                           | 0                           |
| <b>PDB Code</b>                                                   | <b>7Q8T</b>                 |
| *Values for the highest resolution shell are shown in parentheses |                             |

**Table S1: Data collection and refinement**

## SI References

- 1 W. Kabsch, *Acta Crystallogr. Sect. D Biol. Crystallogr.*, 2010, **66**, 125–132.
- 2 P. R. Evans and G. N. Murshudov, *Acta Crystallogr. Sect. D Biol. Crystallogr.*, 2013, **69**, 1204–1214.
- 3 A. A. Lebedev, A. A. Vagin and G. N. Murshudov, *Acta Crystallogr. Sect. D Biol. Crystallogr.*, 2007, **64**, 33–39.
- 4 P. Emsley and K. Cowtan, *Acta Crystallogr. Sect. D Biol. Crystallogr.*, 2004, **60**, 2126–2132.
- 5 A. A. Vagin, R. A. Steiner, A. A. Lebedev, L. Potterton, S. McNicholas, F. Long and G. N. Murshudov, *Acta Crystallogr. Sect. D Biol. Crystallogr.*, 2004, **60**, 2184–2195.
